# Supplementary material for: Effect of the Solvate Environment of Lithium Cations on the Resistance of the Polymer Electrolyte/Electrode Interface in a Solid-State Lithium Battery
Source: MDPI journal article supplement (doi:10.3390/membranes12111111), 2022-11-08
Supplement: s1 [file s1]

## Electronic supplementary information

### The effect of the solvate environment of lithium cations on the resistance of polymer electrolyte/electrode interface in solid- state lithium battery

Alexander V. Chernyak, Nikita A. Slesarenko, Anna A. Slesarenko, Guzaliya R. Baymuratova, Galiya Z.Tulibaeva, Alena V.Yudina, Vitaly I. Volkov, Alexander F. Shestakov and Olga V. Yarmolenko

#### Table of Contents

|                                                                                                                                                    |    |
|----------------------------------------------------------------------------------------------------------------------------------------------------|----|
| <b>Table S1.</b> Electrolyte Compositions and Equivalent Cell Circuits $\text{LiFePO}_4//\text{LiFePO}_4$                                          | 3  |
| <b>Table S2.</b> Calculated parameters of equivalent circuits of cells 1-3                                                                         | 4  |
| <b>Figure S1.</b> $^1\text{H}$ NMR (a) and $^{13}\text{C}$ NMR (b) high resolution spectrum of GBL                                                 | 5  |
| <b>Figure S2.</b> $^1\text{H}$ NMR (a) and $^{13}\text{C}$ NMR (b) high resolution spectrum of DOL                                                 | 6  |
| <b>Figure S3.</b> $^1\text{H}$ NMR (a) and $^{13}\text{C}$ NMR (b) high resolution spectrum of DME                                                 | 7  |
| <b>Figure S4.</b> $^1\text{H}$ NMR (a) and $^{13}\text{C}$ NMR (b) high resolution spectrum of DOL+DME                                             | 8  |
| <b>Assignment of NMR lines of solvent spectra</b>                                                                                                  | 9  |
| <b>Figure S5.</b> $^1\text{H}$ NMR spectrum of electrolytes a) №1 b), №2, c) №3, d) №4.                                                            | 10 |
| <b>Figure S6.</b> $^7\text{Li}$ NMR spectrum of electrolytes a) №1 b), №2, c) №3, d) №4.                                                           | 11 |
| <b>Figure S7.</b> $^{11}\text{B}$ NMR spectrum of electrolytes a) №1 b), №2, c) №4.                                                                | 12 |
| <b>Figure S8.</b> $^{13}\text{C}$ NMR spectrum of electrolytes a) №1 b), №2, c) №3, d) №4.                                                         | 13 |
| <b>Figure S9.</b> $^{19}\text{F}$ NMR spectrum of electrolytes a) №1 b), №2, c) №3, d) №4.                                                         | 14 |
| <b>Assignment of NMR lines of electrolyte spectra</b>                                                                                              | 15 |
| <b>Table S3.</b> Calculated and corrected values of $^1\text{H}$ chemical shifts of solvent molecules for different model solvate complexes in ppm | 17 |
| <b>Table S4.</b> Energies of formation at $T=0$ K, $dE$ , and enthalpies of formation $dH$ at $T=298$ K of solvate complexes                       | 18 |
| <b>Figure S10.</b> Calculated structure of solvate complex $\text{Li}^+(\text{DME})_4$ (a), $\text{Li}^+(\text{DME})_3$ (b),                       | 19 |

$\text{Li}^+(\text{DOL})(\text{DME})_3$  (c),  $\text{Li}^+(\text{DOL})_2(\text{DME})_2$  (d),  $\text{Li}^+(\text{DOL})_3(\text{DME})$  (e),  $\text{Li}^+(\text{DOL})_4$  (f),  
 $\text{Li}^+(\text{GBL})_4$  (g). Bond lengths are given in Å

**Table S5.** Cartesian coordination of calculated structures in Å

21

**Table S1.** Electrolyte Compositions and Equivalent Cell Circuits  
 $\text{LiFePO}_4//\text{LiFePO}_4$

| №  | Electrolyte  | $\text{LiFePO}_4$ treatment          | Equivalent Circuits*                                                                |
|----|--------------|--------------------------------------|-------------------------------------------------------------------------------------|
| №1 | NPE membrane | no                                   | 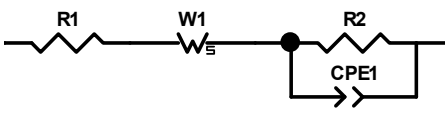  |
| №2 | NPE membrane | 1M $\text{LiBF}_4$ in GBL            |  |
| №3 | NPE membrane | 1 M $\text{LiTFSI}$ in DOL/DME (1:1) |  |

\* Elements of equivalent circuits:  $R1$  - electrolyte resistance,  $R2$  – electrode/electrolyte interface resistance,  $CPE1$  – constant phase element,  $W1$  – closed Warburg element.

**Table S2.** Calculated parameters of equivalent circuits of cells 1-3

| Cell number    | №1                   | №2                   | №3                   |
|----------------|----------------------|----------------------|----------------------|
| $R_1$ , Ohm    | 0.87                 | 0.77                 | 0.27                 |
| $R_2$ , Ohm    | 5                    | 357                  | 2.08                 |
| $CPE1-T$ , $F$ | $2.3 \times 10^{-5}$ | $4.8 \times 10^{-5}$ | $4.5 \times 10^{-3}$ |
| $CPE1-P$       | 0.92                 | 0.61                 | 0.9                  |
| $W1-R$ , Ohm   | 5.1                  | -                    | 7.2                  |
| $W1-T$ , sec   | 0.00003              | -                    | 0.000026             |
| $W1-P$         | 0.37                 | -                    | 0.34                 |

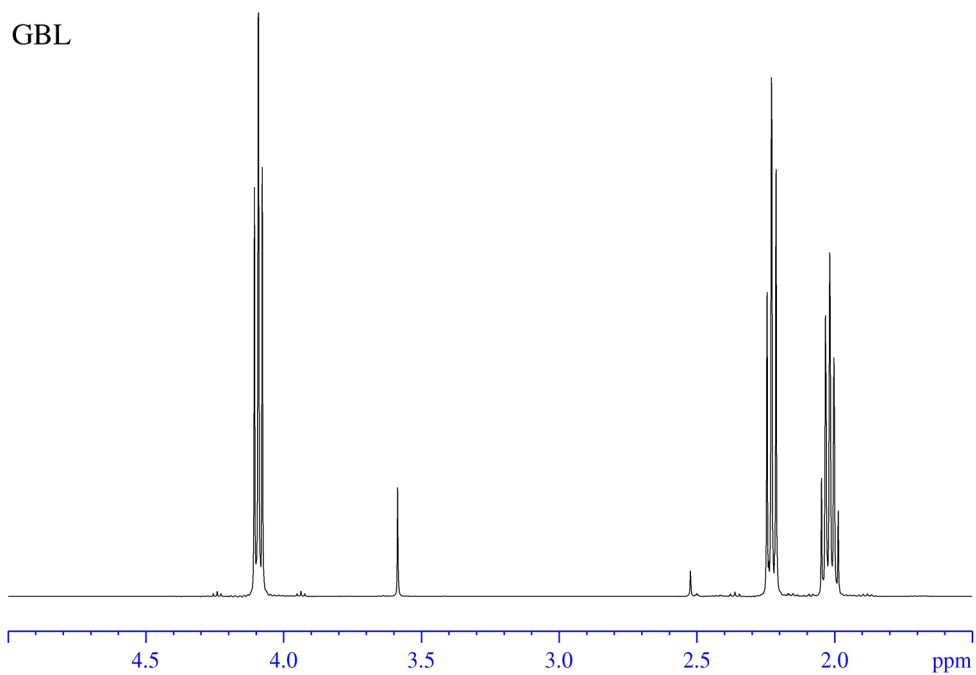

a

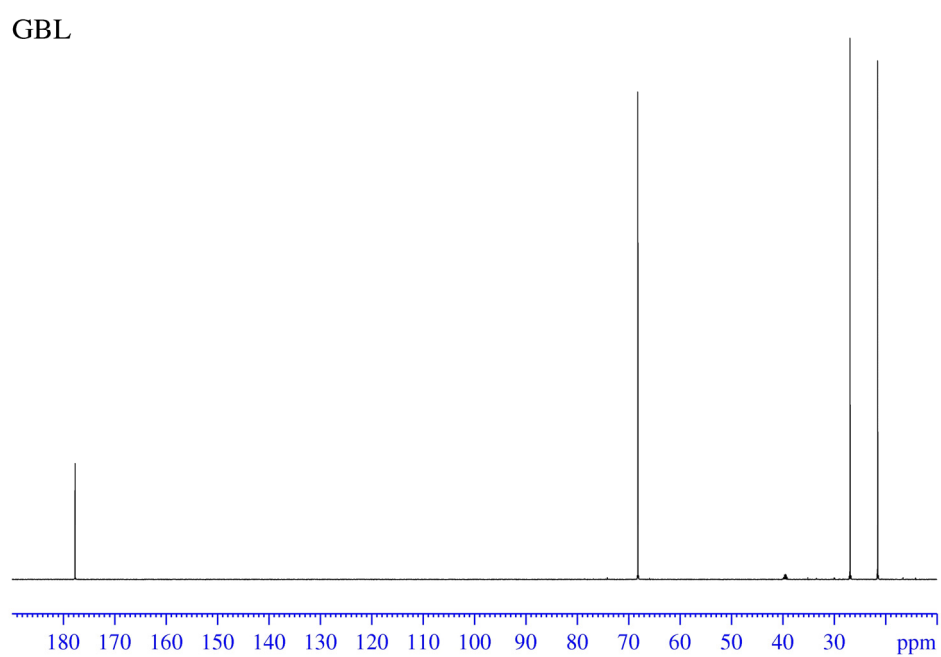

b

**FigureS1.** <sup>1</sup>H NMR (a) and <sup>13</sup>C NMR (b) high resolution spectrum of GBL

DOL

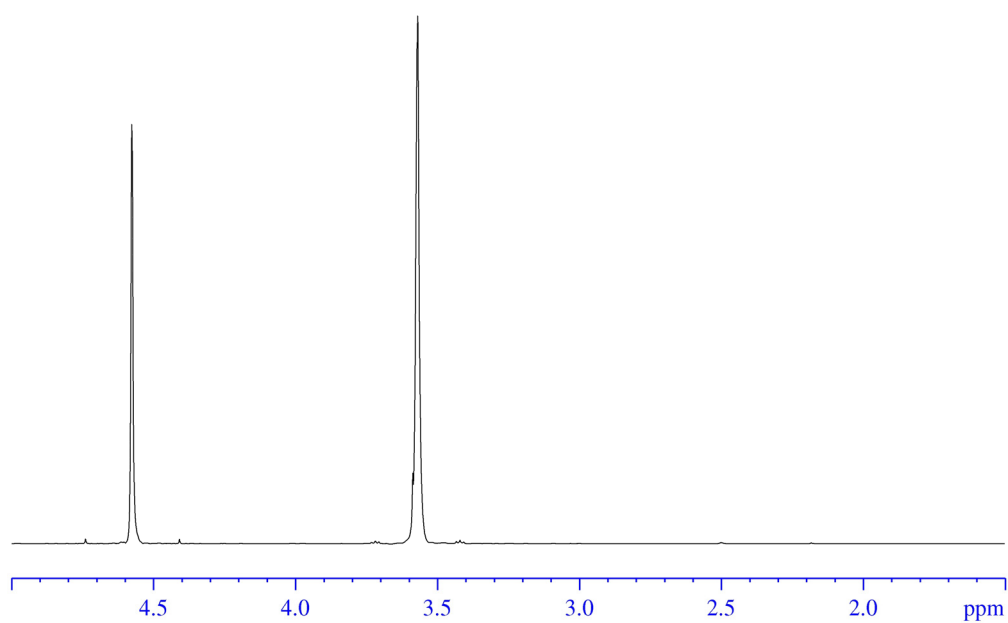

a

DOL

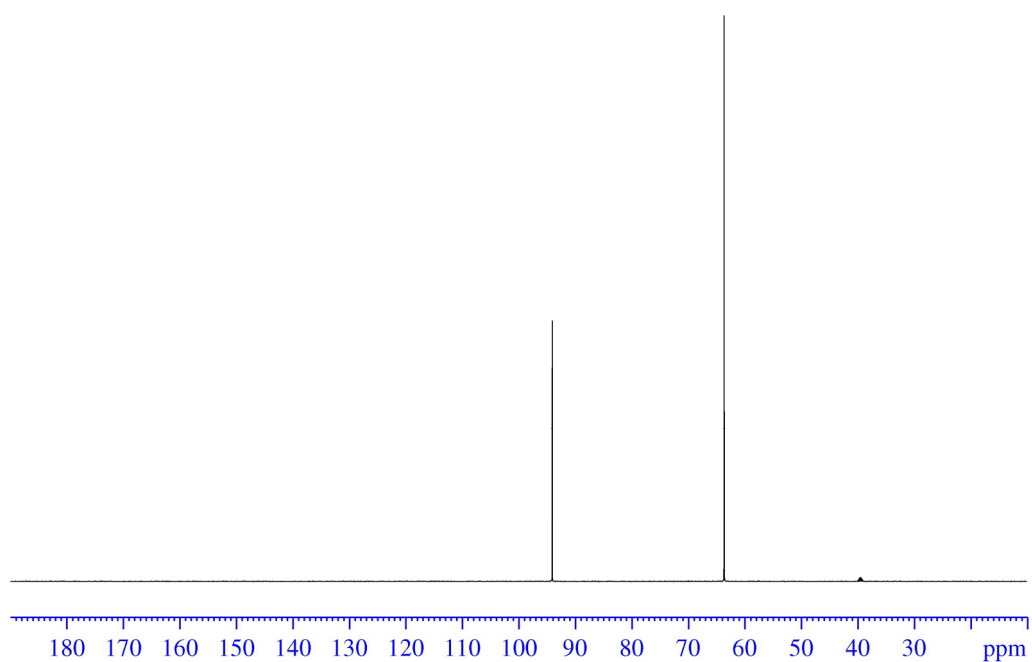

b

**FigureS2.** <sup>1</sup>H NMR (a) and <sup>13</sup>C NMR (b) high resolution spectrum of DOL

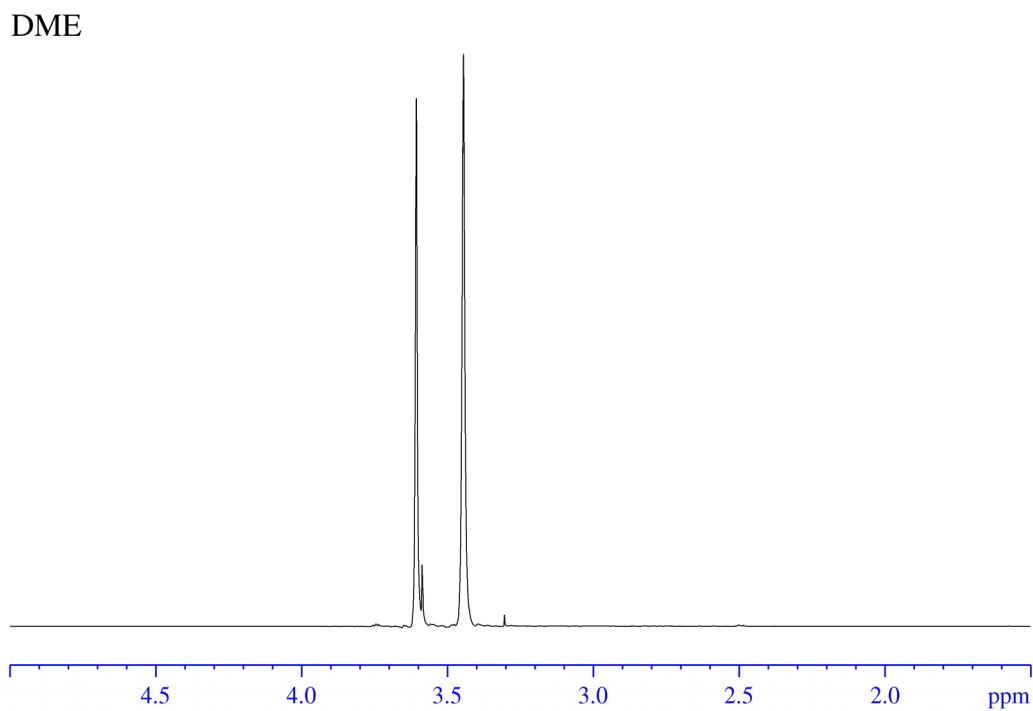

a

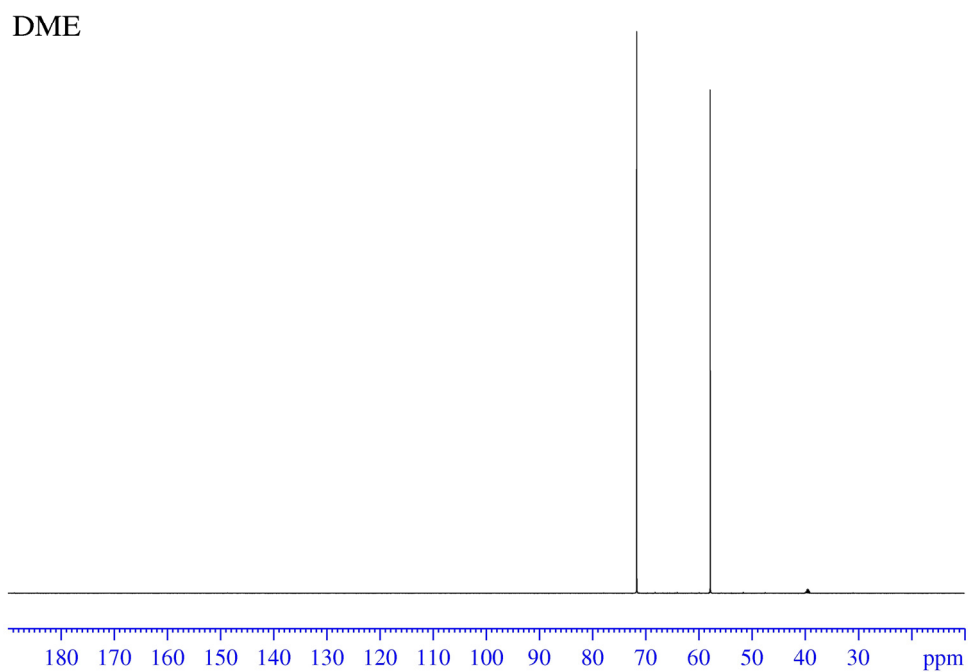

b

**FigureS3.** <sup>1</sup>H NMR (a) and <sup>13</sup>C NMR (b) high resolution spectrum of DME

DOL+DME

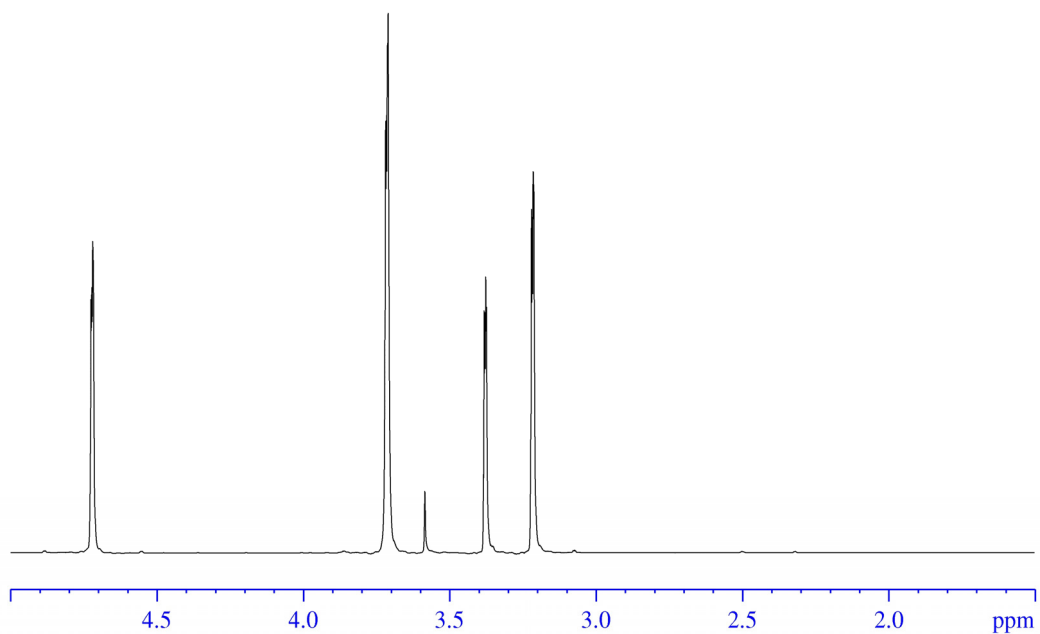

a

DOL+DME

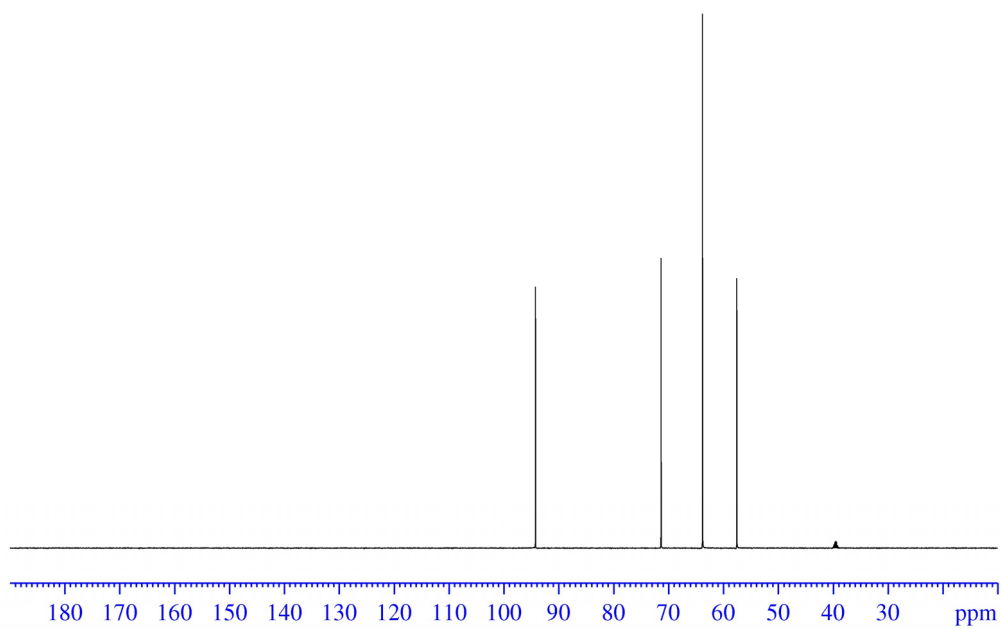

b

**FigureS4.** <sup>1</sup>H NMR (a) and <sup>13</sup>C NMR (b) high resolution spectrum of DOL+DME



### *Assignment of NMR lines of solvent spectra*

**GBL -  $^1\text{H}$**  ( $\delta$  ppm, J Hz): 4.09 (2H, t., -CH<sub>2</sub>-O-,  $^3J_{\text{H-H}}=7,0$ ), 2.23 (2H, t., -CH<sub>2</sub>-CO,  $^3J_{\text{H-H}}=8,1$ ), 2.02 (2H, quintet., CH<sub>2</sub>-CH<sub>2</sub>-CH<sub>2</sub>,  $^3J_{\text{H-H}}=7,6$ )

**$^{13}\text{C}$**  ( $\delta$  ppm, J Hz): 177.7 (1C, s., C=O), 68.2 (1C, s., CH<sub>2</sub>-O), 26.9 (1C, s., CH<sub>2</sub>-CO), 21.5 (1C, s., CH<sub>2</sub>-CH<sub>2</sub>-CH<sub>2</sub>).

**DOL -  $^1\text{H}$**  ( $\delta$  ppm, J Hz): 4.57 (2H, s., -O-CH<sub>2</sub>-O-), 3.44 (4H, s., O-CH<sub>2</sub>-CH<sub>2</sub>-O);

**$^{13}\text{C}$**  ( $\delta$  ppm, J Hz): 94.1 (1C, s., -O-CH<sub>2</sub>-O-), 63.8 (2C, s., O-CH<sub>2</sub>-CH<sub>2</sub>-O);

**DME -  $^1\text{H}$**  ( $\delta$  ppm, J Hz): 3.61 (4H, s., -CH<sub>2</sub>-O-), 3.44 (6H, s., -CH<sub>3</sub>-O);

**$^{13}\text{C}$**  ( $\delta$  ppm, J Hz): 71.7 (2C, s., -CH<sub>2</sub>-O-), 57.8 (2C, s., O-CH<sub>3</sub>)

**DOL/DME (1:1 mol) -  $^1\text{H}$**  ( $\delta$  ppm, J Hz): **DOL** - 4.72 (2H, s., -O-CH<sub>2</sub>-O-), 3.71 (4H, s., O-CH<sub>2</sub>-CH<sub>2</sub>-O); **DME**- 3.38 (4H, s., -CH<sub>2</sub>-O-), 3.22 (6H, s., -CH<sub>3</sub>-O)

**$^{13}\text{C}$**  ( $\delta$  ppm, J Hz): **DOL** - 94.2 (1C, s., -O-CH<sub>2</sub>-O-), 63.8 (2C, s., O-CH<sub>2</sub>-CH<sub>2</sub>-O); **DME** - 71.4 (2C, s., -CH<sub>2</sub>-O-), 57.6 (2C, s., O-CH<sub>3</sub>)

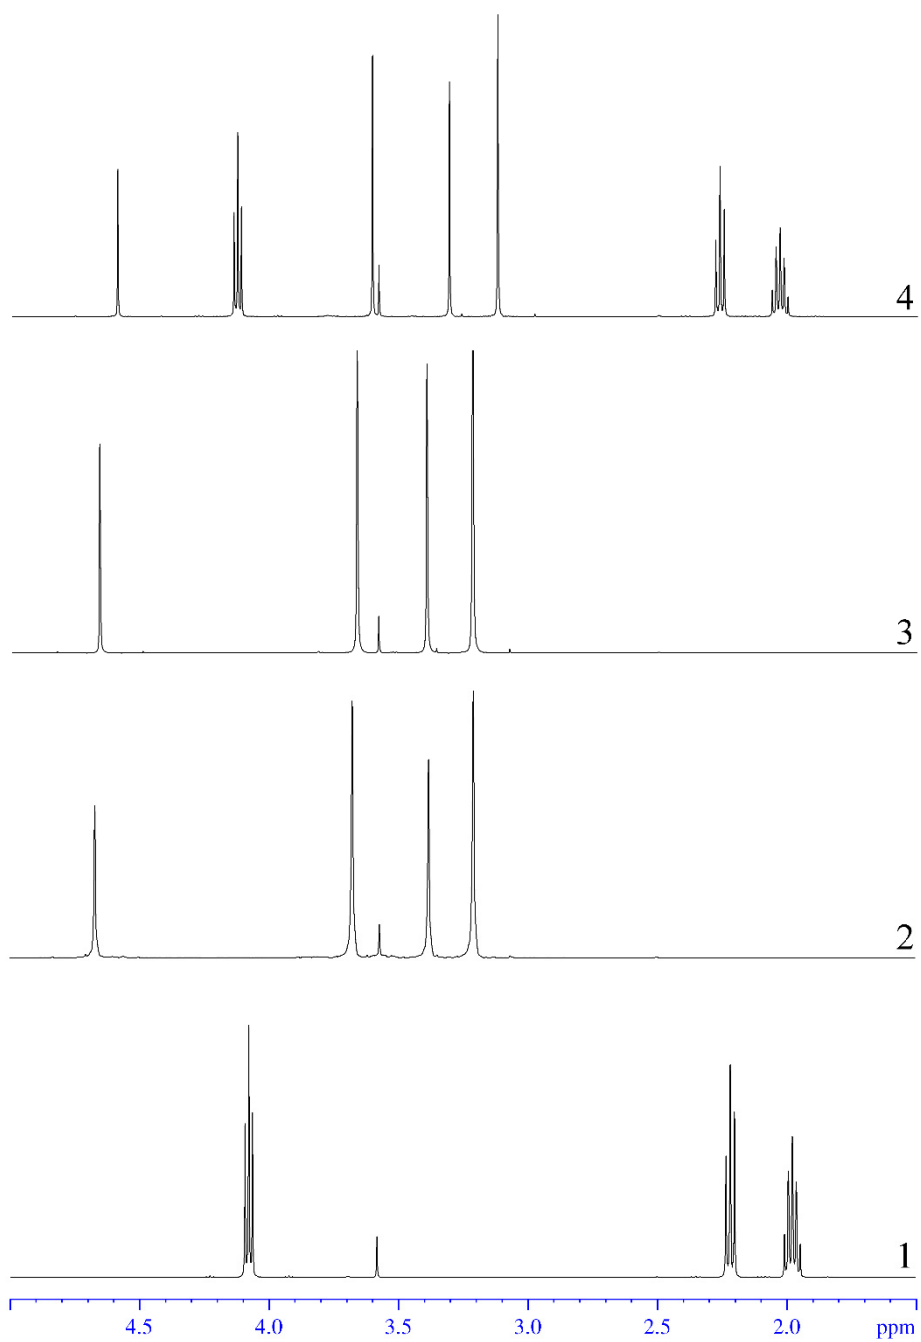

**Figure S5.**  $^1\text{H}$  NMR spectrum of electrolytes. The numbers in the figure correspond to the electrolyte composition number.

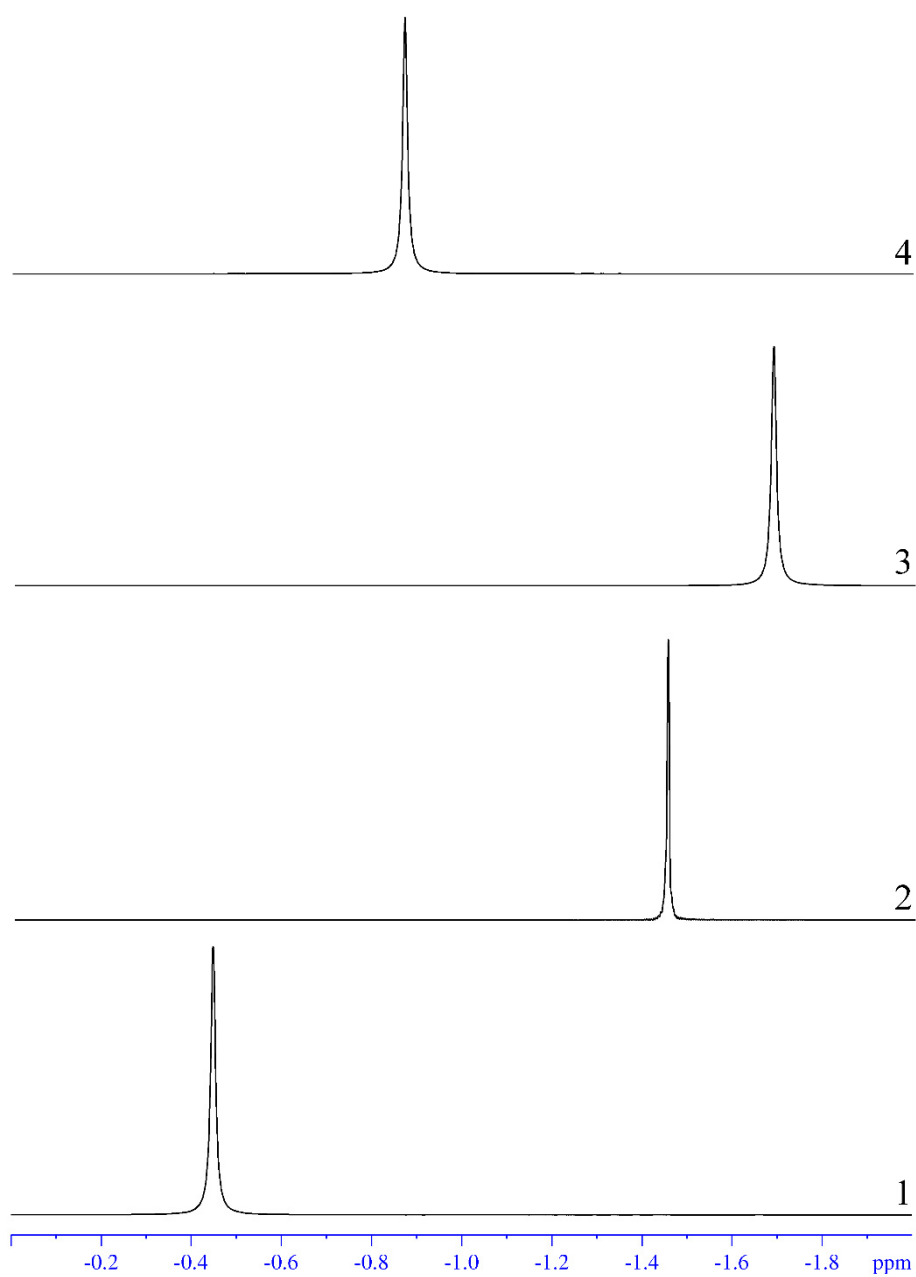

**FigureS6.**  $^7\text{Li}$  NMR spectrum of electrolytes. The numbers in the figure correspond to the electrolyte composition number.

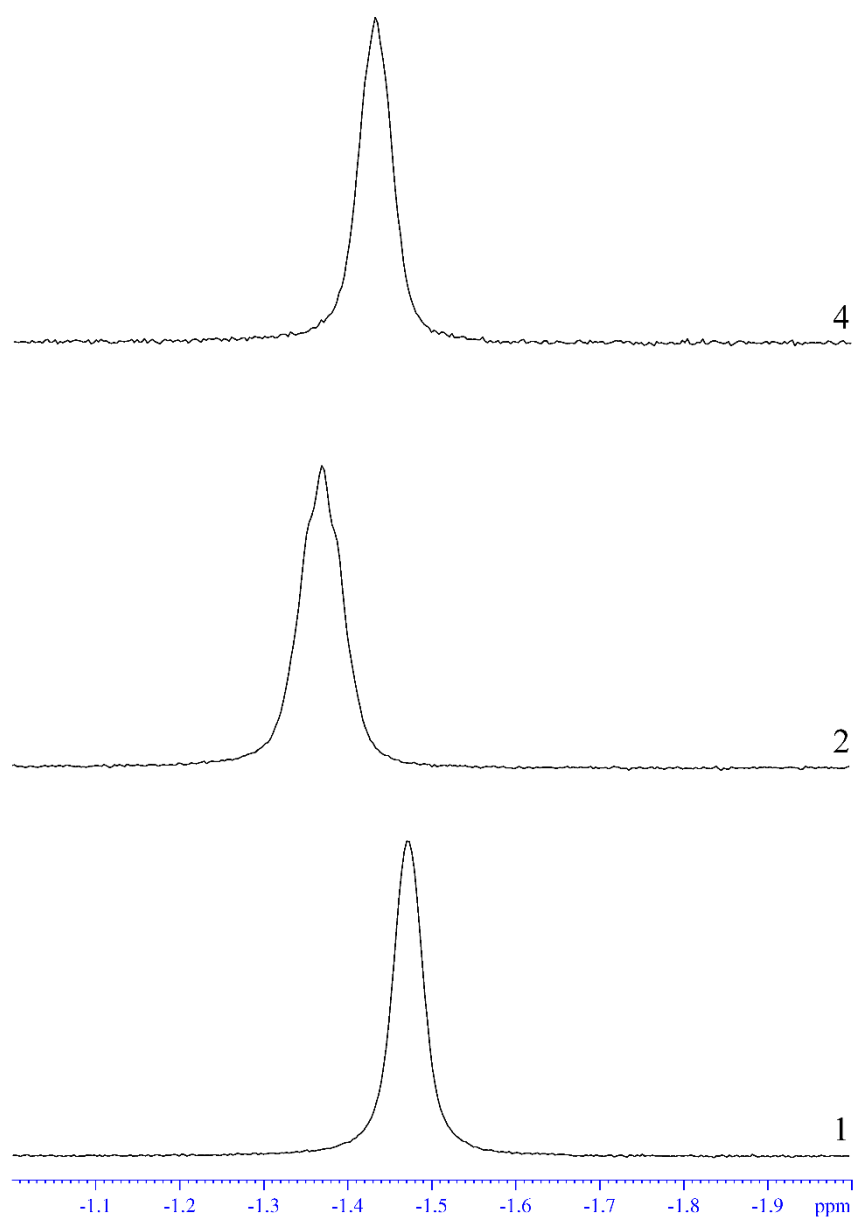

**Figure S7.**  $^{11}\text{B}$  NMR spectrum of electrolytes. The numbers in the figure correspond to the electrolyte composition number.

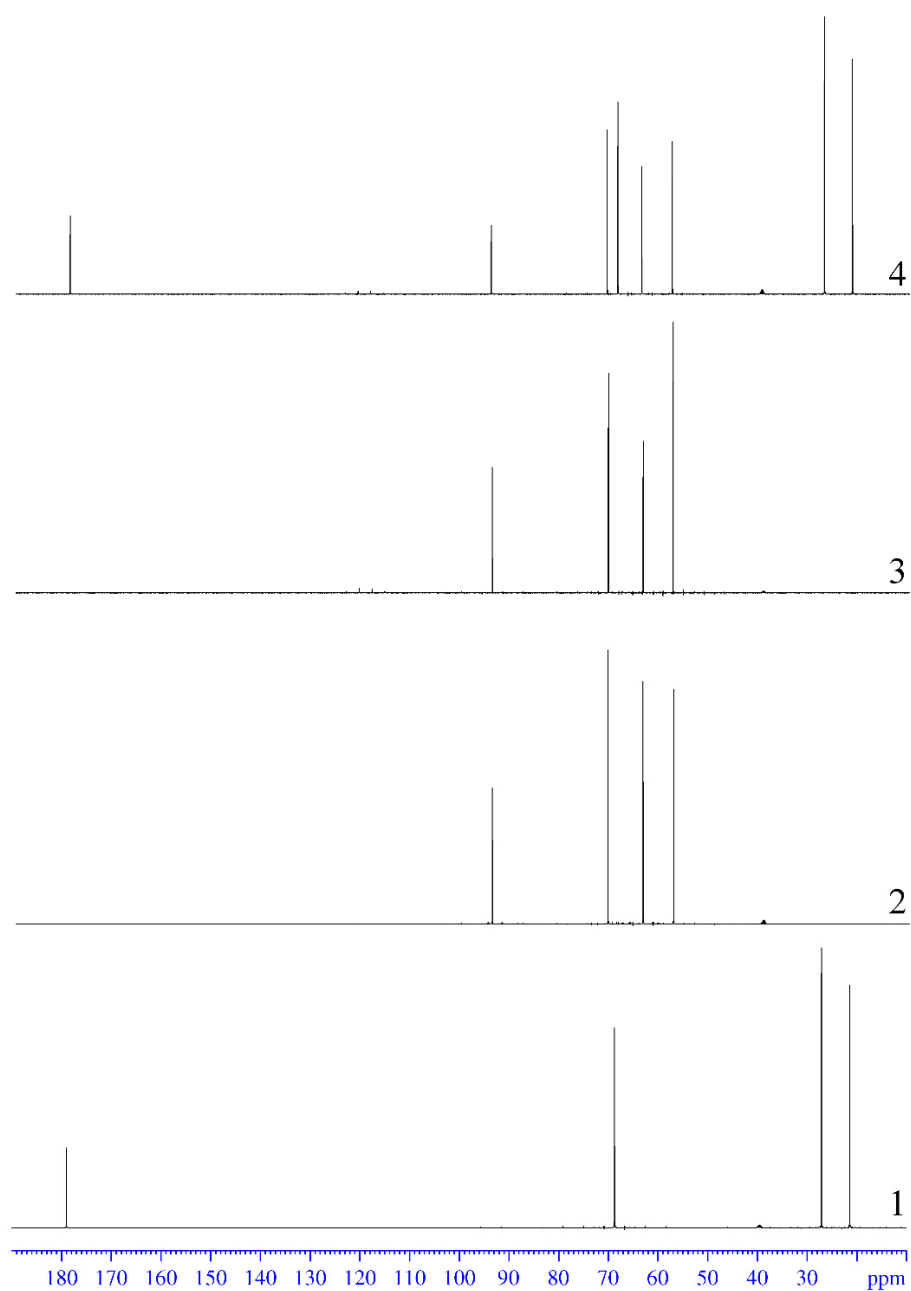

**Figure S8.**  $^{13}\text{C}$  NMR spectrum of electrolytes. The numbers in the figure correspond to the electrolyte composition number.

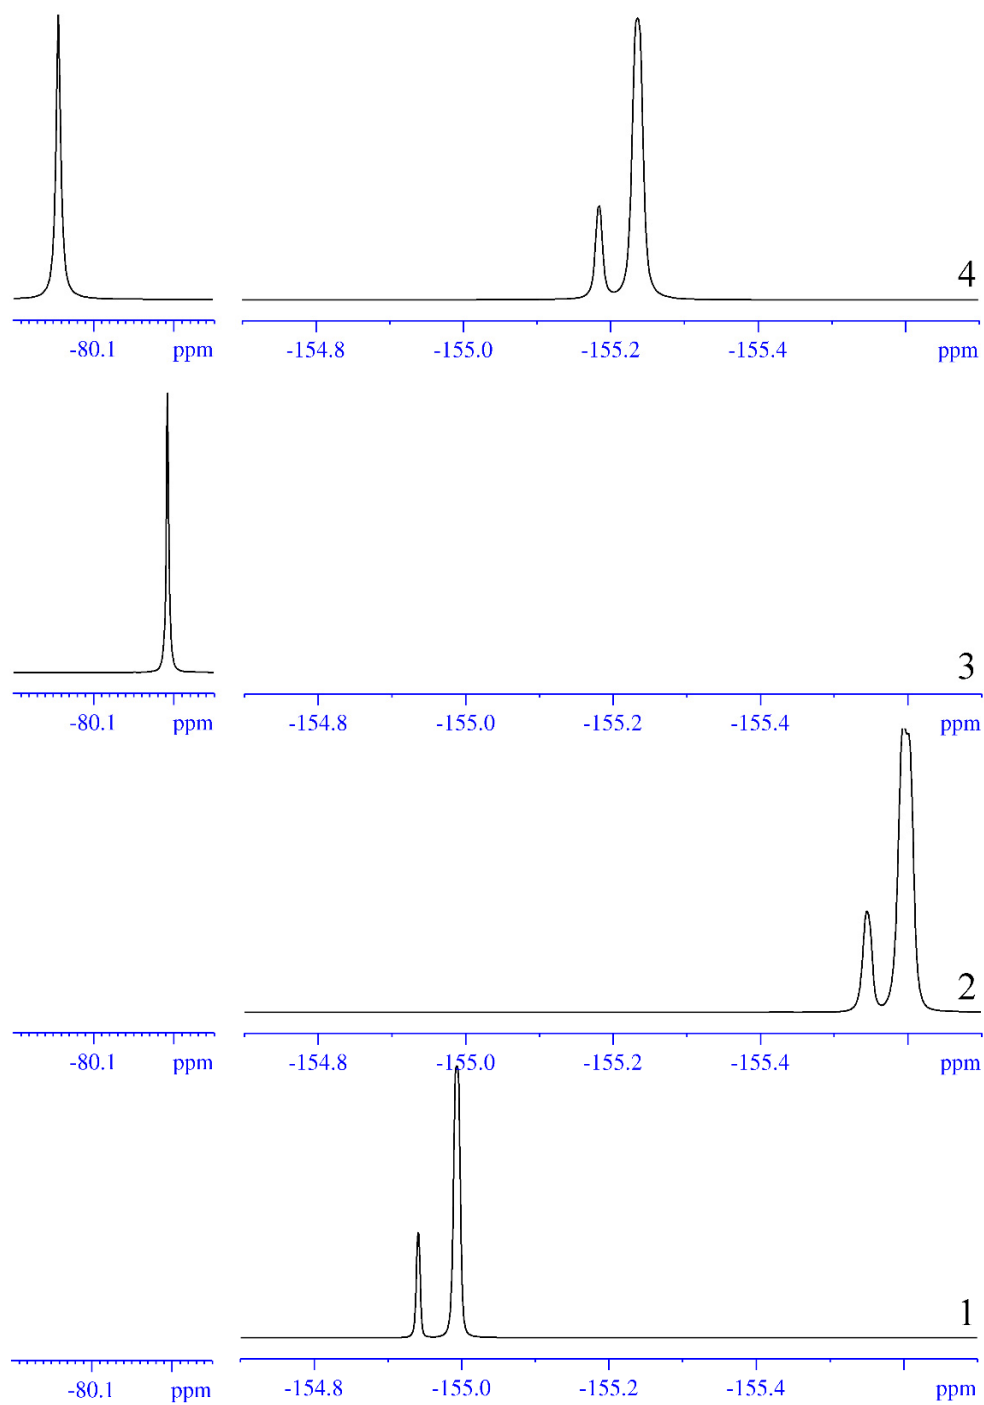

**Figure S9.**  $^{19}\text{F}$  NMR spectrum of electrolytes. The numbers in the figure correspond to the electrolyte composition number.

## *Assignment of NMR lines of electrolyte spectra*

### Electrolyte №1 (1 M LiBF<sub>4</sub> in GBL)

**1H** ( $\delta$  ppm, J Hz): **GBL** - 4.08 (2H, t., -CH<sub>2</sub>-O-, <sup>3</sup>J<sub>H-H</sub>=7,0), 2.22 (2H, t., -CH<sub>2</sub>-CO, <sup>3</sup>J<sub>H-H</sub>=8,1), 1.98 (2H, quintet., CH<sub>2</sub>-CH<sub>2</sub>-CH<sub>2</sub>, <sup>3</sup>J<sub>H-H</sub>=7,6)

**13C** ( $\delta$  ppm, J Hz): **GBL** - 179.0 (1C, s., C=O), 68.7 (1C, s., CH<sub>2</sub>-O), 27.1 (1C, s., CH<sub>2</sub>-CO), 21.4 (1C, s., CH<sub>2</sub>-CH<sub>2</sub>-CH<sub>2</sub>).

**7Li** ( $\delta$  ppm): **LiBF<sub>4</sub>** - -0.45

**11B** ( $\delta$  ppm): **LiBF<sub>4</sub>** - -1.47

**19F** ( $\delta$  ppm): **LiBF<sub>4</sub>** - -154.94 (s., Li<sup>10</sup>BF<sub>4</sub>), -154.99 (s., Li<sup>11</sup>BF<sub>4</sub>)

### Electrolyte №2 (1 M LiBF<sub>4</sub> in DOL/DME (1:1 v/v))

**1H** ( $\delta$  ppm, J Hz): **DOL** - 4.67 (2H, s., -O-CH<sub>2</sub>-O-), 3.68 (4H, s., O-CH<sub>2</sub>-CH<sub>2</sub>-O); **DME**- 3.38 (4H, s., -CH<sub>2</sub>-O-), 3.21 (6H, s., -CH<sub>3</sub>-O)

**13C** ( $\delta$  ppm, J Hz): **DOL** - 94.1 (1C, s., -O-CH<sub>2</sub>-O-), 63.8 (2C, s., O-CH<sub>2</sub>-CH<sub>2</sub>-O); **DME** - 70.8 (2C, s., -CH<sub>2</sub>-O-), 57.6 (2C, s., O-CH<sub>3</sub>)

**7Li** ( $\delta$  ppm): **LiBF<sub>4</sub>** - -1.45

**11B** ( $\delta$  ppm): **LiBF<sub>4</sub>** - -1.37

**19F** ( $\delta$  ppm): **LiBF<sub>4</sub>** - -154.94 (s., Li<sup>10</sup>BF<sub>4</sub>), -154.99 (s., Li<sup>11</sup>BF<sub>4</sub>)

### Electrolyte №3 (1 M LiTFSI in DOL/DME (1:1 v/v))

**1H** ( $\delta$  ppm, J Hz): **DOL** - 4.66 (2H, s., -O-CH<sub>2</sub>-O-), 3.67 (4H, s., O-CH<sub>2</sub>-CH<sub>2</sub>-O); **DME**- 3.40 (4H, s., -CH<sub>2</sub>-O-), 3.22 (6H, s., -CH<sub>3</sub>-O)

**13C** ( $\delta$  ppm, J Hz): **DOL** - 94.1 (1C, s., -O-CH<sub>2</sub>-O-), 63.8 (2C, s., O-CH<sub>2</sub>-CH<sub>2</sub>-O); **DME** - 70.7 (2C, s., -CH<sub>2</sub>-O-), 57.7 (2C, s., O-CH<sub>3</sub>); **LiTFSI** - 119.6 (2C, quartet, CF<sub>3</sub>, <sup>1</sup>J<sub>C-F</sub>=321.2)

**<sup>7</sup>Li** (δppm): **LiTFSI** - -1.69

**<sup>19</sup>F** (δppm): **LiTFSI** - -80.19 (s., CF<sub>3</sub>)

*Electrolyte №4 (1 M LiBF<sub>4</sub> in GBL + 1M LiTFSI in DOL/DME (1:1 v/v))*

**<sup>1</sup>H** (δppm, J Hz): **GBL** - 4.13 (2H, t., -CH<sub>2</sub>-O-, <sup>3</sup>J<sub>H-H</sub>=7,0), 2.27 (2H, t., -CH<sub>2</sub>-CO, <sup>3</sup>J<sub>H-H</sub>=8,1), 2.03 (2H, quintet., CH<sub>2</sub>-CH<sub>2</sub>-CH<sub>2</sub>, <sup>3</sup>J<sub>H-H</sub>=7,6); **DOL** - 4.59 (2H, s., -O-CH<sub>2</sub>-O-), 3.61 (4H, s., O-CH<sub>2</sub>-CH<sub>2</sub>-O); **DME**- 3.31 (4H, s., -CH<sub>2</sub>-O-), 3.12 (6H, s., -CH<sub>3</sub>-O)

**<sup>13</sup>C** (δppm, J Hz): **GBL** - 179.0 (1C, s., C=O), 68.8 (1C, s., CH<sub>2</sub>-O), 27.3 (1C, s., CH<sub>2</sub>-CO), 21.6 (1C, s., CH<sub>2</sub>-CH<sub>2</sub>-CH<sub>2</sub>); **DOL** - 94.3 (1C, s., -O-CH<sub>2</sub>-O-), 64.0 (2C, s., O-CH<sub>2</sub>-CH<sub>2</sub>-O); **DME** - 71.0 (2C, s., -CH<sub>2</sub>-O-), 57.9 (2C, s., O-CH<sub>3</sub>)

**<sup>7</sup>Li** (δppm): **LiBF<sub>4</sub>**and**LiTFSI** - -0.87

**<sup>11</sup>B** (δ ppm): **LiBF<sub>4</sub>** -1.43

**<sup>19</sup>F** (δ ppm): **LiBF<sub>4</sub>** -155.18 (s., Li<sup>10</sup>BF<sub>4</sub>), -155.24 (s., Li<sup>11</sup>BF<sub>4</sub>); **LiTFSI** - -80.06 (s., CF<sub>3</sub>)



**Table S3.** Calculated and corrected values of  $^1\text{H}$  chemical shifts of solvent molecules for different model solvate complexes in ppm

| GBL solvent       |         |                                                   |         | DOL/DME solvent   |         |                                                   |         |        |         |                                        |         |
|-------------------|---------|---------------------------------------------------|---------|-------------------|---------|---------------------------------------------------|---------|--------|---------|----------------------------------------|---------|
| LiBF <sub>4</sub> |         | (Li <sup>+</sup> )(BF <sub>4</sub> <sup>-</sup> ) |         | LiBF <sub>4</sub> |         | (Li <sup>+</sup> )(BF <sub>4</sub> <sup>-</sup> ) |         | LiTFSI |         | (Li <sup>+</sup> )(TFSI <sup>-</sup> ) |         |
| calc.             | corr.   | calc.                                             | corr.   | calc.             | corr.   | calc.                                             | corr.   | calc.  | corr.   | calc.                                  | corr.   |
| 2.13              | 1.78    | 2.18                                              | 1,82    | 3,384             | 3,46    | 3,493                                             | 3,55    | 3,420  | 3,49    | 3,463                                  | 3,53    |
| 2.90              | 2.45    | 2,79                                              | 2.35    | 3.597             | 3.55    | 3.571                                             | 3.61    | 3.591  | 3.63    | 3.549                                  | 3.59    |
| 4.53              | 3.86    | 4.52                                              | 3.85    | 3.839             | 3.63    | 4.070                                             | 3.72    | 4.086  | 3.73    | 4.150                                  | 3.78    |
|                   |         |                                                   |         | 5.303             | 4.65    | 5.458                                             | 4.76    | 5.214  | 4.58    | 5.322                                  | 4.66    |
|                   | (0.21)* |                                                   | (0.17)* |                   | (0.16)* |                                                   | (0.24)* |        | (0.18)* |                                        | (0.19)* |

\*The mean square root deviation is given in parenthesis

**Table S4.** Energies of formation at T=0 K, dE, and enthalpies of formation dH at T=298 K of solvate complexes

| Complex                                                  | dE, kcal/mol | dH, kcal/mol |
|----------------------------------------------------------|--------------|--------------|
| (Li <sup>+</sup> )(DME) <sub>2</sub>                     | -83.38       | -84.34       |
| (Li <sup>+</sup> ) (DME) <sub>3</sub>                    | -99.65       | -100.18      |
| (Li <sup>+</sup> ) (DME) <sub>3</sub> Z                  | -103.21      | -104.02      |
| (Li <sup>+</sup> ) (DME) <sub>4</sub>                    | -105.26      | -105.65      |
| (Li <sup>+</sup> ) (DOL)(DME) <sub>2</sub>               | -94.42       | -95.11       |
| (Li <sup>+</sup> ) (DOL) <sub>2</sub> (DME)              | -89.12       | -89.71       |
| (Li <sup>+</sup> ) (DOL) <sub>2</sub> (DME) <sub>2</sub> | -98.65       | -98.63       |
| (Li <sup>+</sup> ) (DOL) <sub>3</sub>                    | -76.69       | -77.13       |
| (Li <sup>+</sup> ) (DOL) <sub>3</sub> (DME)              | -96.15       | -96.23       |
| (Li <sup>+</sup> ) (DOL) <sub>4</sub>                    | -93.39       | -93.64       |
| (Li <sup>+</sup> ) (DOL) <sub>5</sub>                    | -98.00       | -97.57       |
|                                                          |              |              |
| (Li <sup>+</sup> ) (GBL) <sub>2</sub>                    | -77.15       | -78.69       |
| (Li <sup>+</sup> ) (GBL) <sub>3</sub>                    | -99.58       | -99.50       |
| (Li <sup>+</sup> ) (GBL) <sub>4</sub>                    | -114.04      | -113.35      |

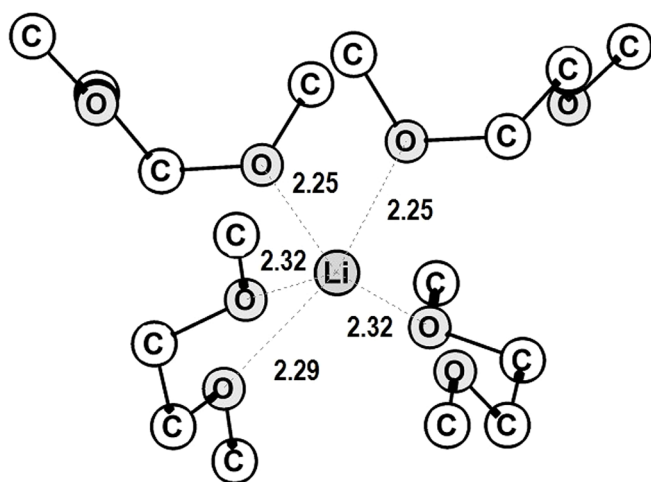

a

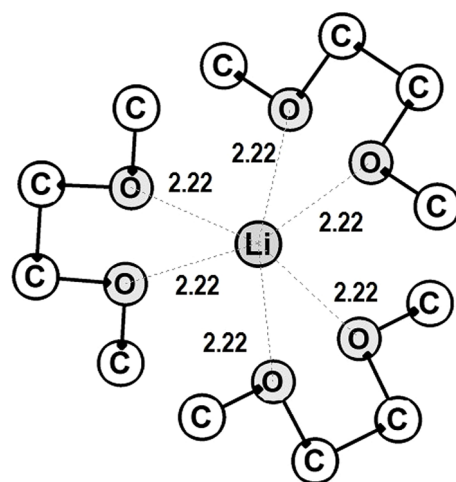

b

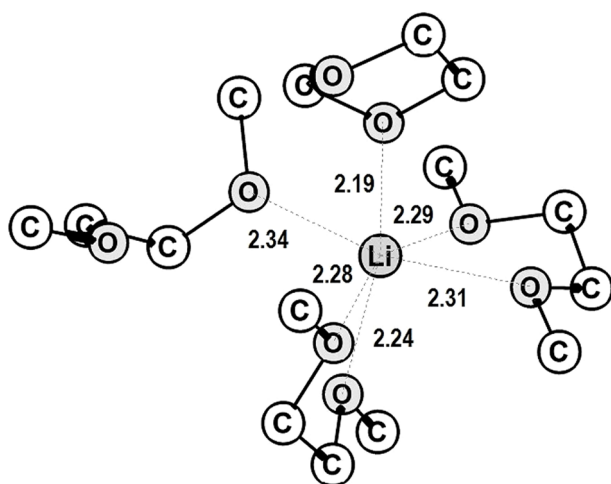

c

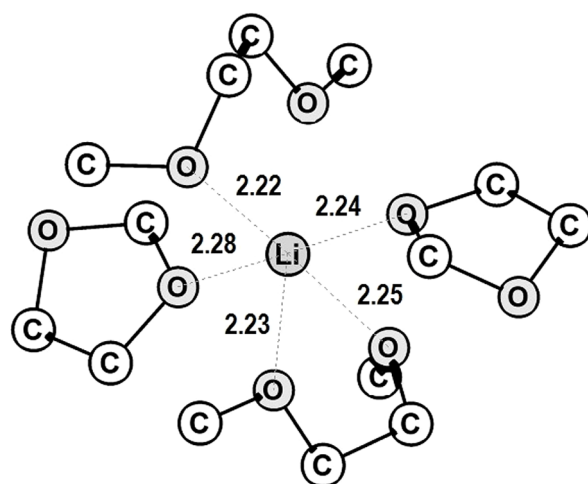

d

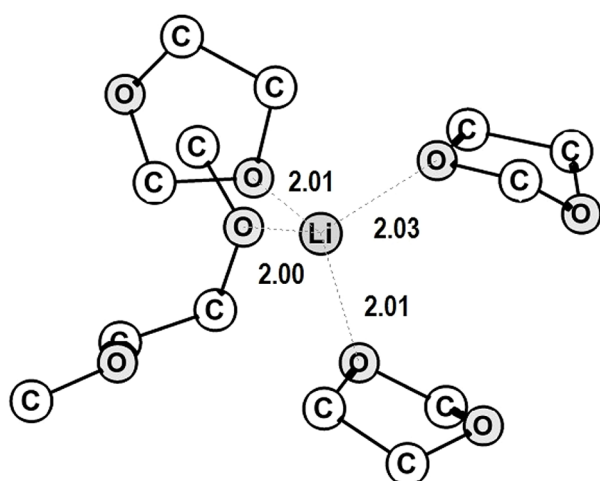

e

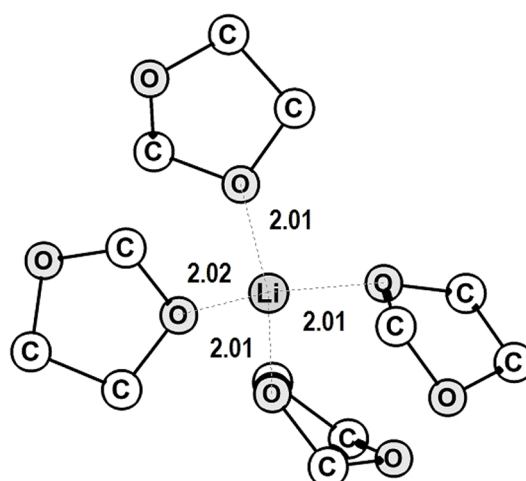

f

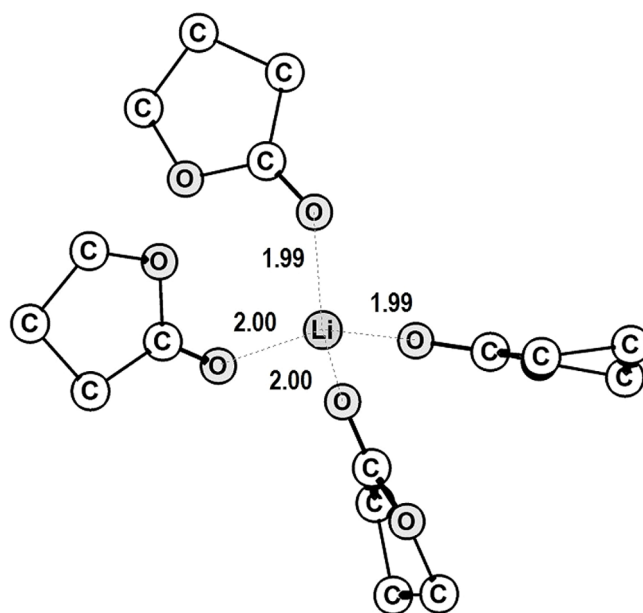

g

**Figure S10.** Calculated structure of solvate complex  $\text{Li}^+(\text{DME})_4$  (a),  $\text{Li}^+(\text{DME})_3$  (b),  $\text{Li}^+(\text{DOL})(\text{DME})_3$  (c),  $\text{Li}^+(\text{DOL})_2(\text{DME})_2$  (d),  $\text{Li}^+(\text{DOL})_3(\text{DME})$  (e),  $\text{Li}^+(\text{DOL})_4$  (f),  $\text{Li}^+(\text{GBL})_4$  (g). Bond lengths are given in Å

**Table S5.** Cartesian coordination of calculated structures in Å

LiBF<sub>4</sub>(GBL)<sub>12</sub>

|   |             |             |             |
|---|-------------|-------------|-------------|
| 6 | 3.25057418  | -0.14383626 | -3.21068241 |
| 6 | 4.81370153  | -0.70632594 | -1.67888884 |
| 6 | 4.53552017  | -0.29470200 | -3.98272362 |
| 8 | 5.25979923  | -1.05184684 | -0.62399794 |
| 1 | 3.00254352  | 0.89663907  | -3.03223414 |
| 1 | 2.39473523  | -0.63390315 | -3.65596091 |
| 1 | 4.65264199  | 0.46123496  | -4.76285385 |
| 1 | 4.56952281  | -1.27905324 | -4.44766607 |
| 6 | -4.66122422 | -1.15913945 | 4.25213988  |
| 6 | -2.44447954 | -0.42003763 | 4.06141969  |
| 6 | -4.45799053 | -0.30467951 | 3.02908804  |
| 8 | -3.17133019 | 0.26105236  | 3.19517662  |
| 8 | -1.33859273 | -0.10995171 | 4.39849840  |
| 1 | -5.04526838 | -0.55074810 | 5.07385743  |
| 1 | -5.35639901 | -1.98309357 | 4.08098460  |
| 1 | -5.17298492 | 0.50966560  | 2.92940567  |
| 1 | -4.45426405 | -0.89962429 | 2.12116948  |
| 6 | 3.66353994  | 4.23578680  | 1.11208947  |
| 6 | 4.20512177  | 2.99652536  | -0.71046980 |
| 6 | 4.86836207  | 4.90818109  | 0.49722210  |
| 8 | 4.22755054  | 2.05697144  | -1.45066990 |
| 1 | 3.76009562  | 4.04726919  | 2.18212189  |
| 1 | 2.74168432  | 4.77714419  | 0.93404098  |
| 1 | 5.77669278  | 4.60580778  | 1.02381151  |
| 1 | 4.80804562  | 5.99845811  | 0.53269109  |
| 8 | 3.57367223  | 2.98949213  | 0.45073038  |
| 8 | 3.51156926  | -0.74851859 | -1.96163603 |

|   |             |             |             |
|---|-------------|-------------|-------------|
| 8 | 0.84300753  | 4.62012265  | 0.09587390  |
| 6 | 0.87389600  | 4.23930268  | -1.03479525 |
| 8 | 2.01531689  | 3.94227368  | -1.66602228 |
| 6 | 0.33416301  | 3.17550580  | -3.06082145 |
| 6 | 1.77988405  | 3.59793353  | -3.01706545 |
| 1 | 0.24977594  | 2.13302914  | -2.77353215 |
| 1 | -0.12249479 | 3.30691122  | -4.04351338 |
| 1 | 1.96811105  | 4.48223494  | -3.63547070 |
| 1 | 2.49283792  | 2.82624277  | -3.30144961 |
| 6 | 3.10349050  | 0.72627488  | 2.28128006  |
| 6 | 1.59560400  | 1.33011027  | 0.58160939  |
| 6 | 1.95986637  | 1.56622578  | 2.78911310  |
| 8 | 1.33210019  | 2.07354868  | 1.62658941  |
| 8 | 1.04599838  | 1.47334982  | -0.48213186 |
| 1 | 4.00127555  | 1.33029960  | 2.18248629  |
| 1 | 3.33175092  | -0.10714502 | 2.94275277  |
| 1 | 2.26560778  | 2.41355706  | 3.40678766  |
| 1 | 1.22391561  | 0.98300572  | 3.33696537  |
| 6 | -0.26132028 | 4.05393253  | -1.99567915 |
| 1 | -0.51710445 | 5.04430975  | -2.38200499 |
| 1 | -1.13473072 | 3.65616849  | -1.49985565 |
| 6 | 4.86185769  | 4.33503395  | -0.89798772 |
| 1 | 4.22551753  | 4.90398302  | -1.57321986 |
| 1 | 5.84198301  | 4.22054105  | -1.36163423 |
| 6 | 5.55772203  | -0.19834669 | -2.87999418 |
| 1 | 6.46856393  | -0.77811599 | -3.03284722 |
| 1 | 5.83294499  | 0.83225191  | -2.66264553 |
| 6 | -3.24941317 | -1.59404805 | 4.53706112  |
| 1 | -2.97138719 | -2.43668862 | 3.91424358  |

1 -3.02313440 -1.82563534 5.57716284  
6 2.60773107 0.29488002 0.93118353  
1 2.09099794 -0.65350808 0.96973162  
1 3.35701130 0.24675825 0.15567158  
9 -1.66317847 -1.56574909 1.95484297  
5 -0.66842410 -0.71974218 1.52993280  
9 -1.05692078 0.58930504 1.54102554  
9 -0.33200550 -1.05309686 0.19860230  
3 -0.24820036 0.20764065 -1.10203149  
9 0.45791672 -0.89788295 2.30186695  
8 -3.17458627 2.87430082 -3.80074112  
6 -3.27703176 1.69380070 -3.67812958  
8 -4.14968207 1.09631829 -2.85514522  
6 -4.04429755 -0.31651599 -2.92122671  
1 -5.04691262 -0.74117988 -2.83711852  
1 -3.45719505 -0.66954247 -2.07593323  
6 -2.47857711 0.62388138 -4.37163642  
1 -2.23888928 0.92227359 -5.39173688  
1 -4.08741458 -0.62492796 -5.04672648  
1 -1.55113587 0.52124564 -3.81104597  
6 -3.35574076 -0.59439467 -4.23605361  
1 -2.81760794 -1.54256110 -4.23451269  
8 3.39934538 -3.21477860 -3.56753615  
6 3.07103741 -3.35121580 -2.42186890  
8 1.85777828 -3.03968731 -1.98304099  
6 1.71592964 -3.32436367 -0.59579207  
1 1.20291022 -4.28057901 -0.50447446  
1 1.09456128 -2.56043029 -0.15422031  
6 3.87224906 -3.89865550 -1.27796747

1 3.83444577 -4.98918702 -1.35958274  
1 3.20767310 -4.01890558 0.80946154  
1 4.91247208 -3.59231560 -1.34854336  
6 3.12314377 -3.38881977 -0.07399019  
1 3.47700450 -2.39619418 0.17852954  
8 -1.76590441 1.26470169 -1.21555056  
6 -2.74332887 1.76327860 -0.71162778  
8 -3.06988516 3.00980490 -0.93485665  
6 -4.36128706 3.32830639 -0.43341374  
1 -4.93217399 3.75514991 -1.26124628  
1 -4.24349314 4.08328290 0.33932888  
6 -3.73388566 1.13175370 0.19255381  
1 -3.90150067 0.10028348 -0.08457951  
1 -5.65446297 1.62422768 -0.62283262  
1 -3.28307872 1.13655127 1.17354393  
6 -4.93622657 2.03108161 0.08984275  
1 -5.44242917 2.17334163 1.04439015  
8 -3.97270609 -1.92505670 0.12148512  
6 -3.39575174 -2.85011829 0.61623865  
8 -3.66165853 -3.31621203 1.83670513  
6 -2.81253661 -4.40860651 2.15292062  
1 -3.38124507 -5.11773982 2.76096228  
1 -1.97171904 -4.03827793 2.72962256  
6 -2.35237689 -4.94513226 0.82372928  
1 -1.39711081 -5.46404391 0.89195898  
1 -3.09767389 -5.63575246 0.42023207  
1 -2.47776056 -3.79997307 -1.05836039  
6 -2.30902120 -3.68164162 0.00735277  
1 -1.38496985 -3.13705720 0.15625833



|   |             |             |             |
|---|-------------|-------------|-------------|
| 8 | -4.27305804 | 2.77145516  | 3.48514172  |
| 6 | -3.13868759 | 2.98107048  | 3.16579111  |
| 8 | -2.77309533 | 3.23040592  | 1.90994368  |
| 6 | -1.39523674 | 3.54818200  | 1.81067362  |
| 1 | -1.28305851 | 4.36791870  | 1.10843733  |
| 1 | -0.87430063 | 2.68455332  | 1.43061700  |
| 6 | -0.96933827 | 3.87802665  | 3.21517981  |
| 1 | 0.08631637  | 3.67263011  | 3.38366747  |
| 1 | -1.14446300 | 4.93515001  | 3.42654687  |
| 1 | -2.14034538 | 3.38129545  | 5.02406504  |
| 6 | -1.90867484 | 3.02005540  | 4.02295293  |
| 1 | -1.55345943 | 1.99485788  | 4.09091702  |
| 8 | 0.26073498  | -3.77424618 | 1.90115566  |
| 6 | 0.79570825  | -3.29314748 | 2.85668316  |
| 8 | 2.09064525  | -2.97603359 | 2.89127023  |
| 6 | 2.46919172  | -2.54606640 | 4.18857626  |
| 1 | 3.23971974  | -1.78035265 | 4.09078599  |
| 1 | 2.91190854  | -3.39768474 | 4.71667044  |
| 6 | 1.19014376  | -2.08317259 | 4.84008695  |
| 1 | 1.22240884  | -2.15991732 | 5.92949293  |
| 1 | 0.97176900  | -1.05513569 | 4.57489452  |
| 1 | -0.79372858 | -2.55449399 | 4.05760372  |
| 6 | 0.18365797  | -2.99167036 | 4.19175326  |
| 1 | 0.07785316  | -3.94188870 | 4.72322530  |
| 8 | 0.16191480  | -0.65932038 | -2.74410658 |
| 6 | -0.02072902 | -1.75993478 | -3.19640454 |
| 8 | -0.76906472 | -2.66869106 | -2.60232046 |
| 6 | -0.73932841 | -3.89901015 | -3.31618827 |
| 1 | -1.72142433 | -4.36971882 | -3.22732090 |

|   |             |             |             |
|---|-------------|-------------|-------------|
| 1 | -0.00049166 | -4.54758650 | -2.84732845 |
| 6 | -0.35361581 | -3.52245121 | -4.72738521 |
| 1 | 0.16365009  | -4.32880593 | -5.25193346 |
| 1 | -1.24674501 | -3.26693536 | -5.30214960 |
| 1 | 0.44022881  | -1.53718254 | -5.27333972 |
| 6 | 0.49912935  | -2.29887138 | -4.49619007 |
| 1 | 1.54319876  | -2.55654306 | -4.33583493 |

### Li<sup>+</sup>BF<sub>4</sub><sup>-</sup>(GBL)<sub>12</sub>

|   |             |             |             |
|---|-------------|-------------|-------------|
| 6 | 3.44336903  | 0.36704319  | -2.57807239 |
| 6 | 4.71050084  | -0.29632637 | -0.82726131 |
| 6 | 4.87094569  | 0.43882143  | -3.05283453 |
| 8 | 4.97062114  | -0.79026613 | 0.23155153  |
| 1 | 3.06392618  | 1.35102573  | -2.33226872 |
| 1 | 2.74939112  | -0.11762421 | -3.25120987 |
| 1 | 5.05781387  | 1.29493337  | -3.70469410 |
| 1 | 5.13074722  | -0.47369795 | -3.58801778 |
| 6 | -3.40407062 | -0.27544271 | 4.77560350  |
| 6 | -1.22587723 | 0.48331605  | 4.29644076  |
| 6 | -3.19809326 | -0.01292416 | 3.30773038  |
| 8 | -1.98334808 | 0.71181301  | 3.22799426  |
| 8 | -0.12484514 | 0.93077194  | 4.43323378  |
| 1 | -3.90494158 | 0.57532663  | 5.24455844  |
| 1 | -4.00054773 | -1.16848975 | 4.95821888  |
| 1 | -3.98533501 | 0.58935925  | 2.85370219  |
| 1 | -3.08802222 | -0.92952188 | 2.75103423  |
| 6 | 2.95785550  | 5.42265567  | 1.15308188  |
| 6 | 3.49826476  | 4.17277872  | -0.67277369 |

|   |             |             |             |
|---|-------------|-------------|-------------|
| 6 | 3.60139014  | 6.37308281  | 0.16771992  |
| 8 | 3.76893877  | 3.20853263  | -1.32893798 |
| 1 | 3.39762145  | 5.45392884  | 2.15328033  |
| 1 | 1.88499921  | 5.57844721  | 1.23163424  |
| 1 | 4.65628467  | 6.51476349  | 0.41447342  |
| 1 | 3.12355051  | 7.35533561  | 0.15607679  |
| 8 | 3.18268095  | 4.12709881  | 0.61344719  |
| 8 | 3.50961716  | -0.38896692 | -1.38900013 |
| 8 | 0.23084533  | 5.05997212  | -0.06410163 |
| 6 | 0.26109627  | 4.52478859  | -1.13410093 |
| 8 | 0.89755856  | 3.38284316  | -1.35470373 |
| 6 | -0.23910022 | 3.82437737  | -3.32161481 |
| 6 | 0.91456997  | 3.05897780  | -2.73012150 |
| 1 | -1.14130815 | 3.23827715  | -3.22520454 |
| 1 | -0.08993753 | 4.06465699  | -4.37669194 |
| 1 | 1.87567416  | 3.37825204  | -3.13731155 |
| 1 | 0.83718084  | 1.98243109  | -2.83609772 |
| 6 | 1.79594761  | 1.76750732  | 2.06309349  |
| 6 | 0.93539605  | 0.98228985  | 0.03130503  |
| 6 | 0.48162733  | 2.40243787  | 1.72457858  |
| 8 | -0.01762411 | 1.64717094  | 0.63589903  |
| 8 | 0.74384146  | 0.35388183  | -0.97744935 |
| 1 | 2.50730582  | 2.47798674  | 2.48076116  |
| 1 | 1.62964220  | 0.97869763  | 2.78170776  |
| 1 | 0.59070132  | 3.42547014  | 1.38192929  |
| 1 | -0.24334229 | 2.35407732  | 2.52885563  |
| 6 | -0.31419146 | 5.02758806  | -2.42417275 |
| 1 | 0.32518172  | 5.84530696  | -2.76946281 |
| 1 | -1.31383369 | 5.42031913  | -2.26515158 |

|   |             |             |             |
|---|-------------|-------------|-------------|
| 6 | 3.47010005  | 5.60811250  | -1.12597659 |
| 1 | 2.50610508  | 5.77931127  | -1.60071245 |
| 1 | 4.24903168  | 5.79227865  | -1.86552204 |
| 6 | 5.60165109  | 0.50318904  | -1.73563728 |
| 1 | 6.61508577  | 0.10217103  | -1.72896853 |
| 1 | 5.62264189  | 1.51995858  | -1.34019549 |
| 6 | -1.98517728 | -0.37952747 | 5.26138473  |
| 1 | -1.60358493 | -1.38634326 | 5.15583875  |
| 1 | -1.81288047 | -0.04165718 | 6.28334875  |
| 6 | 2.22221228  | 1.19342008  | 0.74396180  |
| 1 | 2.77035209  | 0.26577620  | 0.79774357  |
| 1 | 2.78866388  | 1.90078171  | 0.15157225  |
| 9 | -0.69479897 | -1.80784555 | 3.18454418  |
| 5 | -0.41299688 | -1.69048141 | 1.83076974  |
| 9 | -1.47519232 | -1.09346697 | 1.17638074  |
| 9 | -0.21867622 | -2.95790302 | 1.31706795  |
| 3 | -0.62743418 | -0.10869724 | -2.17653483 |
| 9 | 0.71743910  | -0.91840831 | 1.67432843  |
| 8 | -3.48450838 | 4.41957165  | -2.64906236 |
| 6 | -3.87841910 | 3.31885905  | -2.88299340 |
| 8 | -4.48984026 | 2.54105405  | -1.98310657 |
| 6 | -4.86767485 | 1.29301611  | -2.54367769 |
| 1 | -5.84178357 | 1.01507469  | -2.13370143 |
| 1 | -4.13944818 | 0.54144365  | -2.24546888 |
| 6 | -3.77069457 | 2.54897719  | -4.17138069 |
| 1 | -3.84713498 | 3.21503904  | -5.03025833 |
| 1 | -5.81988017 | 1.93588583  | -4.35893889 |
| 1 | -2.78343848 | 2.08506928  | -4.17387977 |
| 6 | -4.86298229 | 1.51835411  | -4.03720801 |

1 -4.68678367 0.60085406 -4.60335751  
8 4.01013538 -2.63584016 -3.24721867  
6 3.28920602 -2.82198591 -2.30372023  
8 2.01509001 -2.46121221 -2.30145216  
6 1.38614541 -2.77155764 -1.06221262  
1 0.79302287 -3.67137187 -1.21574147  
1 0.72917110 -1.96030725 -0.80665525  
6 3.61085692 -3.48287598 -0.99856739  
1 3.55309760 -4.56261646 -1.16712631  
1 2.24552206 -3.66104578 0.70549455  
1 4.62285264 -3.24629296 -0.68123454  
6 2.51317718 -2.98420540 -0.09915401  
1 2.80082287 -2.03960284 0.33644378  
8 -1.74640849 1.37981729 -1.86659695  
6 -2.09060807 1.96419717 -0.86877470  
8 -1.85839867 3.24210184 -0.71456147  
6 -2.44127802 3.75252229 0.46770696  
1 -2.89370832 4.71476758 0.22838628  
1 -1.64441846 3.91156140 1.18885856  
6 -2.84682726 1.44656099 0.30132088  
1 -3.56927644 0.70846974 -0.01679107  
1 -4.40412113 2.90817012 0.49146349  
1 -2.13225429 0.95246999 0.94585341  
6 -3.42138710 2.69802090 0.91018882  
1 -3.50994998 2.65373243 1.99536178  
8 -3.26187337 -2.97991519 2.46876890  
6 -2.66035027 -3.66183133 3.24651858  
8 -2.57628430 -3.39013674 4.54463633  
6 -1.85891219 -4.40314593 5.23820649

1 -2.35433381 -4.56914100 6.19947672  
1 -0.84899770 -4.04757118 5.41708578  
6 -1.86885167 -5.59757132 4.31723698  
1 -0.99833460 -6.23787656 4.45688768  
1 -2.76915009 -6.19432268 4.48810719  
1 -2.43478696 -5.50525532 2.18884492  
6 -1.92715803 -4.93538443 2.96536479  
1 -0.94240024 -4.64869969 2.61176333  
8 -1.41104727 -1.67860795 -1.59749575  
6 -2.37884565 -2.10310967 -1.03126679  
8 -3.47654435 -1.38775732 -0.83848910  
6 -4.45807467 -2.14804629 -0.13528423  
1 -5.44136626 -1.86443181 -0.52118710  
1 -4.39561284 -1.89380110 0.91809072  
6 -4.07763627 -3.58498261 -0.38010192  
1 -4.42304487 -4.24710804 0.41273754  
1 -4.50160119 -3.93005528 -1.32706688  
1 -2.09193576 -4.21347640 -1.12288517  
6 -2.57795481 -3.47806892 -0.48387781  
1 -2.09787124 -3.47967774 0.48631691  
8 0.79554114 -4.31405174 3.85405856  
6 1.45334130 -3.31469219 3.89122564  
8 2.24909531 -2.91723491 2.91128132  
6 3.01658408 -1.79059223 3.29347781  
1 3.17322823 -1.16102814 2.42258290  
1 3.99549094 -2.14662295 3.63135252  
6 2.23179497 -1.15210022 4.40874208  
1 2.85897278 -0.58253953 5.09754637  
1 1.48089448 -0.49008509 4.00551984

|   |             |             |             |
|---|-------------|-------------|-------------|
| 1 | 0.58458038  | -2.15138646 | 5.46080495  |
| 6 | 1.56289720  | -2.34466536 | 5.03339891  |
| 1 | 2.18240035  | -2.81960695 | 5.79994230  |
| 8 | 0.35065784  | -0.45144897 | -3.76613181 |
| 6 | 0.61326106  | -1.51935767 | -4.26111580 |
| 8 | -0.08542388 | -2.61230354 | -4.03487218 |
| 6 | 0.51082255  | -3.73729082 | -4.66960823 |
| 1 | -0.28810705 | -4.41244237 | -4.98734209 |
| 1 | 1.12985405  | -4.25326342 | -3.93645872 |
| 6 | 1.33148817  | -3.15623938 | -5.79691547 |
| 1 | 2.18001893  | -3.78701654 | -6.07082091 |
| 1 | 0.70586066  | -3.02543461 | -6.68314058 |
| 1 | 1.83518706  | -1.00936469 | -5.94283048 |
| 6 | 1.72685184  | -1.81827212 | -5.22092542 |
| 1 | 2.63659052  | -1.89341459 | -4.63044787 |

### LiBF<sub>4</sub>(DD)<sub>12</sub>

|   |             |             |            |
|---|-------------|-------------|------------|
| 6 | 1.26226798  | -3.08162189 | 4.45724064 |
| 6 | 0.44088904  | -2.41531181 | 2.54460962 |
| 6 | 0.49839585  | -1.79100259 | 4.69305162 |
| 8 | 0.21773547  | -1.32916825 | 3.40032519 |
| 1 | 2.18579701  | -3.15911331 | 5.03411053 |
| 1 | 0.64456222  | -3.95269678 | 4.69796782 |
| 1 | 1.08542723  | -1.05112348 | 5.22343859 |
| 1 | -0.42423298 | -1.96039650 | 5.25627146 |
| 8 | 1.54430147  | -3.03129541 | 3.09018846 |
| 6 | 4.02701446  | -0.53124815 | 4.87954871 |
| 6 | 2.56243377  | 1.10446778  | 4.98199634 |

|   |             |             |             |
|---|-------------|-------------|-------------|
| 6 | 3.37229562  | -0.38711484 | 3.51559678  |
| 8 | 2.32312196  | 0.51693643  | 3.74774890  |
| 1 | 4.18608482  | -1.56718064 | 5.18637583  |
| 1 | 4.99485920  | -0.02051213 | 4.91022120  |
| 1 | 2.96157102  | -1.31291700 | 3.14159456  |
| 1 | 4.05715017  | 0.00443926  | 2.76552129  |
| 8 | 3.11196507  | 0.09136966  | 5.74646925  |
| 6 | 0.19225669  | 1.85518411  | -3.02099174 |
| 6 | -1.40438756 | 1.86898204  | -1.49870138 |
| 6 | -0.24765156 | 0.43708736  | -2.80664956 |
| 8 | -1.20579748 | 0.53316480  | -1.80639441 |
| 1 | 1.08871830  | 2.06685140  | -2.44781354 |
| 1 | 0.39582916  | 2.11079662  | -4.06507071 |
| 1 | 0.56212558  | -0.21435739 | -2.51220169 |
| 1 | -0.70670195 | 0.02931592  | -3.70220328 |
| 8 | -0.88777875 | 2.59200271  | -2.55209421 |
| 6 | -1.30721211 | -2.85744643 | -1.81932875 |
| 8 | -1.05400755 | -2.34521143 | -3.07994039 |
| 6 | -2.32232628 | -2.11692108 | -3.61374485 |
| 1 | -2.27299094 | -1.39850968 | -4.43305223 |
| 6 | -3.09830765 | -1.62704429 | -2.41944159 |
| 8 | -2.39365080 | -2.14932577 | -1.33356445 |
| 1 | -4.13364901 | -1.97705959 | -2.41277402 |
| 1 | -3.10083617 | -0.54821432 | -2.37053216 |
| 1 | -2.74740578 | -3.04659248 | -4.00813912 |
| 1 | -1.57176796 | -3.91951706 | -1.88975621 |
| 1 | -0.44224262 | -2.74607421 | -1.17363330 |
| 1 | 3.26766337  | 1.94058763  | 4.86687397  |
| 1 | 1.63587741  | 1.48557776  | 5.42402998  |



|   |             |             |             |
|---|-------------|-------------|-------------|
| 1 | -2.45851135 | 2.09524761  | -1.36935194 |
| 1 | -0.87720796 | 2.10418987  | -0.58174215 |
| 1 | 0.60408982  | -2.08771308 | 1.53093513  |
| 1 | -0.42728836 | -3.07703981 | 2.58026363  |
| 6 | 5.21074171  | -2.29637839 | 0.21699987  |
| 1 | 4.83826883  | -1.27673716 | 0.20108976  |
| 1 | 6.12253115  | -2.35027409 | -0.37869602 |
| 1 | 5.46211230  | -2.55362061 | 1.25294204  |
| 1 | 3.07409784  | -2.97160022 | 1.33272086  |
| 6 | 3.00350790  | -3.08277045 | 0.25366127  |
| 1 | 2.48499400  | -2.21336407 | -0.12815293 |
| 8 | 4.27920598  | -3.20219941 | -0.32470456 |
| 6 | 2.21713415  | -4.32191703 | -0.05488900 |
| 1 | 2.31533328  | -4.54845495 | -1.11979823 |
| 8 | 0.86501426  | -4.15324773 | 0.28713776  |
| 1 | 2.64975760  | -5.16910411 | 0.48525847  |
| 6 | 0.13641290  | -5.35974923 | 0.23430012  |
| 1 | 0.47668688  | -6.06998951 | 0.99569688  |
| 1 | 0.23101149  | -5.85100939 | -0.73834141 |
| 1 | -0.91650723 | -5.13732013 | 0.40332658  |
| 6 | 2.40344781  | -2.06024525 | -2.82741853 |
| 1 | 2.30197397  | -1.80201801 | -3.88575475 |
| 1 | 1.46129329  | -2.47566883 | -2.48661867 |
| 1 | 3.18474033  | -2.81690471 | -2.74209831 |
| 1 | 4.73535912  | -0.88625060 | -2.19278295 |
| 6 | 3.85909525  | -0.27697002 | -2.40973474 |
| 1 | 3.87180248  | -0.06523129 | -3.48834586 |
| 8 | 2.68945362  | -0.93135274 | -2.04601519 |
| 6 | 3.94718158  | 1.01253408  | -1.66673011 |

|   |             |             |             |
|---|-------------|-------------|-------------|
| 1 | 4.75797726  | 1.62229286  | -2.07235462 |
| 8 | 4.15800826  | 0.77339586  | -0.31112788 |
| 1 | 3.01580718  | 1.55212225  | -1.81086102 |
| 6 | 4.07169089  | 1.93052568  | 0.46965734  |
| 1 | 3.07505568  | 2.36176572  | 0.43487594  |
| 1 | 4.78826572  | 2.69114858  | 0.15156995  |
| 1 | 4.29044259  | 1.66305769  | 1.50292261  |
| 6 | -1.30392657 | 1.47226981  | 4.28277025  |
| 1 | -1.68286126 | 2.32117661  | 4.85856756  |
| 1 | -0.90194656 | 0.73764409  | 4.97848188  |
| 1 | -2.13054302 | 1.03189617  | 3.73268846  |
| 1 | -1.47209977 | 2.38172554  | 1.83060750  |
| 6 | -0.70645414 | 2.81605044  | 2.46311452  |
| 1 | -1.14827489 | 3.67092295  | 2.98154887  |
| 8 | -0.26805978 | 1.86380653  | 3.41147070  |
| 6 | 0.43208991  | 3.27525829  | 1.60206471  |
| 1 | 1.10945197  | 3.91858517  | 2.17688235  |
| 8 | -0.10221695 | 3.94545816  | 0.50518312  |
| 1 | 1.00411076  | 2.41122754  | 1.28850956  |
| 6 | 0.83186194  | 4.30149750  | -0.48402509 |
| 1 | 1.43846754  | 3.45061832  | -0.77884026 |
| 1 | 1.50493458  | 5.09047187  | -0.13002533 |
| 1 | 0.28066775  | 4.65659169  | -1.34663145 |
| 3 | 0.70714253  | 0.36274506  | 2.72156650  |
| 9 | -0.24860814 | 0.39529606  | 1.09557855  |
| 5 | 0.85165162  | 0.02833303  | 0.30544531  |
| 9 | 0.58603984  | -1.13375316 | -0.34846396 |
| 9 | 1.21176167  | 1.06907137  | -0.49422417 |
| 9 | 1.83709230  | -0.18321291 | 1.28391429  |

1 -5.05073995 -5.60335693 -1.39394972  
 6 -4.05717031 -5.17432054 -1.56561299  
 1 -4.18322385 -4.27663950 -2.17284103  
 1 -3.46200895 -5.89789451 -2.12796546  
 8 -3.38850625 -4.90160678 -0.35876161  
 6 -4.03944045 -3.94540171 0.43662224  
 6 -3.20826133 -3.69919809 1.65938578  
 1 -2.23111297 -3.32466793 1.35114305  
 1 -5.02808502 -4.30440974 0.74408096  
 1 -3.03979294 -4.65005083 2.17378917  
 1 -4.17619918 -3.00856132 -0.09593074  
 8 -3.85745426 -2.78590484 2.50531240  
 6 -3.22086164 -2.60976570 3.74608842  
 1 -2.26672298 -2.08922478 3.64327704  
 1 -3.03294408 -3.56274193 4.25073260  
 1 -3.87482484 -2.01087080 4.38364679  
 1 -3.12652528 1.03882309 -5.74602918  
 6 -2.76483490 1.73429123 -4.97977449  
 1 -3.00426830 2.74703870 -5.31603822  
 1 -1.68681308 1.64367914 -4.90473117  
 8 -3.31504209 1.45913182 -3.72146411  
 6 -4.70225368 1.57042138 -3.67112723  
 6 -5.13329419 1.61591497 -2.23983776  
 1 -4.76958870 0.73487961 -1.71589777  
 1 -5.19068085 0.73197166 -4.18993389  
 1 -6.23121072 1.60138552 -2.18605044  
 1 -5.03793502 2.48651076 -4.16558179  
 8 -4.61613336 2.77925633 -1.67215233  
 6 -4.94644794 2.96692726 -0.32113336

|   |             |             |             |
|---|-------------|-------------|-------------|
| 1 | -4.47696650 | 2.21681511  | 0.30761666  |
| 1 | -6.02884142 | 2.91817101  | -0.16137337 |
| 1 | -4.59168349 | 3.94808443  | -0.02160592 |
| 8 | -4.16371528 | -0.47397540 | 0.06677965  |
| 6 | -5.12324449 | -0.33069371 | 1.07052440  |
| 1 | -5.98601372 | 0.21024828  | 0.67173521  |
| 1 | -5.47406792 | -1.30014733 | 1.42866194  |
| 6 | -4.39434578 | 0.42591775  | 2.16599220  |
| 1 | -4.88053494 | 1.36181167  | 2.45608476  |
| 1 | -4.30683952 | -0.19003968 | 3.06402294  |
| 8 | -3.13811436 | 0.69556638  | 1.61775382  |
| 6 | -2.92733476 | -0.30329701 | 0.66871277  |
| 1 | -2.62674699 | -1.21842606 | 1.16884717  |
| 1 | -2.17885414 | -0.01779510 | -0.05433578 |
| 8 | -1.57164069 | 5.73595499  | -2.66519363 |
| 6 | -1.56803849 | 6.66291049  | -1.61756044 |
| 1 | -0.54610940 | 6.99550905  | -1.41901934 |
| 1 | -2.15516990 | 7.55266173  | -1.87563084 |
| 6 | -2.20322385 | 5.90555818  | -0.45947531 |
| 1 | -1.52937007 | 5.74568888  | 0.37843995  |
| 1 | -3.08966657 | 6.43294342  | -0.08528319 |
| 8 | -2.55380153 | 4.67470310  | -1.01700368 |
| 6 | -2.63844630 | 4.88703310  | -2.38077778 |
| 1 | -3.58565263 | 5.38952432  | -2.62444153 |
| 1 | -2.56986080 | 3.95709223  | -2.93493611 |
| 1 | 6.80246599  | 0.36923548  | -3.59155709 |
| 1 | 8.47173388  | 0.14271136  | -3.06693310 |
| 6 | 7.49635529  | 0.54199271  | -2.76485835 |
| 6 | 7.58978096  | 2.00758842  | -2.36051750 |

|   |            |             |             |
|---|------------|-------------|-------------|
| 1 | 8.63548983 | 2.32934251  | -2.29439351 |
| 1 | 7.07789443 | 2.68769181  | -3.04656539 |
| 8 | 6.97387230 | 2.04648733  | -1.10323890 |
| 6 | 7.18110607 | 0.78614819  | -0.56093812 |
| 1 | 8.20666503 | 0.70963452  | -0.16346484 |
| 1 | 6.46749456 | 0.58131884  | 0.23851012  |
| 8 | 7.01714502 | -0.10220303 | -1.61501941 |

### Li<sup>+</sup>BF<sub>4</sub><sup>-</sup>(DD)<sub>12</sub>

|   |             |             |            |
|---|-------------|-------------|------------|
| 1 | 4.08970019  | -0.99024681 | 2.55333282 |
| 6 | 4.27438702  | -0.96434286 | 3.62773503 |
| 1 | 5.19692451  | -1.51856063 | 3.85316999 |
| 8 | 3.21211575  | -1.51603370 | 4.34980511 |
| 8 | 4.36639727  | 0.33717381  | 4.09008637 |
| 6 | 4.20224386  | 0.24025914  | 5.47642939 |
| 1 | 5.17045243  | 0.11320516  | 5.97406158 |
| 1 | 3.73815269  | 1.14725464  | 5.85793908 |
| 6 | 3.33325195  | -0.99389278 | 5.64981195 |
| 1 | 3.79730094  | -1.72656758 | 6.31998799 |
| 1 | 2.34530120  | -0.75733066 | 6.04050782 |
| 1 | -0.13926622 | 1.54408487  | 6.36205660 |
| 6 | 0.12924011  | 1.82799988  | 5.33180005 |
| 1 | -0.02861909 | 2.90675661  | 5.21858811 |
| 8 | -0.63506785 | 1.12742433  | 4.41708395 |
| 8 | 1.45026405  | 1.50668732  | 5.05862034 |
| 6 | 1.51474365  | 1.12328698  | 3.70356382 |
| 1 | 2.19781887  | 1.74370688  | 3.15415562 |
| 1 | 1.87152788  | 0.10699871  | 3.66376583 |

|   |             |             |             |
|---|-------------|-------------|-------------|
| 6 | 0.10499988  | 1.23491845  | 3.22100006  |
| 1 | -0.07519724 | 2.19722798  | 2.75935028  |
| 1 | -0.18242306 | 0.46014729  | 2.52609267  |
| 1 | -0.73666188 | 3.05220780  | -2.83107734 |
| 6 | -1.42390476 | 2.41817894  | -2.29685539 |
| 1 | -1.34570291 | 2.60543882  | -1.23061000 |
| 8 | -1.20905367 | 1.08200105  | -2.55612289 |
| 8 | -2.74187362 | 2.62675925  | -2.70637095 |
| 6 | -3.42286237 | 1.52736495  | -2.19212661 |
| 1 | -3.81843397 | 1.74493804  | -1.19203566 |
| 1 | -4.27098187 | 1.27516464  | -2.82868959 |
| 6 | -2.36399901 | 0.44212928  | -2.13392123 |
| 1 | -2.24634750 | 0.06713528  | -1.11554447 |
| 1 | -2.57580996 | -0.39790937 | -2.78457453 |
| 1 | 0.10645100  | 4.53588971  | -0.07500669 |
| 6 | 0.74088216  | 5.16184713  | -0.71252854 |
| 1 | 0.59875168  | 6.21522548  | -0.41010960 |
| 8 | 0.39871297  | 4.96712614  | -2.03567357 |
| 8 | 2.09118128  | 4.84747529  | -0.57496743 |
| 6 | 2.59038371  | 4.50008959  | -1.83634417 |
| 1 | 3.59595877  | 4.91391780  | -1.96440003 |
| 1 | 2.63837588  | 3.42416887  | -1.93843824 |
| 6 | 1.57616663  | 5.08725382  | -2.76938728 |
| 1 | 1.79595259  | 6.14154142  | -2.96603701 |
| 1 | 1.48061422  | 4.56937683  | -3.71484625 |
| 1 | -5.35619103 | -6.63836596 | -0.41006947 |
| 6 | -5.23342480 | -6.14698303 | -1.37800879 |
| 1 | -5.04227718 | -6.91249973 | -2.13687704 |
| 1 | -6.17129823 | -5.64505718 | -1.63825949 |

8 -4.16049585 -5.23554963 -1.27231645  
 6 -3.89096672 -4.53682137 -2.45614454  
 1 -3.65607252 -5.23531353 -3.26434732  
 1 -4.76470874 -3.95732628 -2.78475755  
 6 -2.73618394 -3.60265541 -2.23120263  
 8 -1.58256578 -4.27257533 -1.80266317  
 6 -0.95702245 -5.06824145 -2.78165198  
 1 0.02046738 -5.36682093 -2.39737412  
 1 -0.81520539 -4.52661463 -3.71888447  
 1 -1.52944455 -5.97485505 -2.99549345  
 1 -2.99660335 -2.90128858 -1.43806511  
 1 -2.54868619 -3.02492111 -3.14264242  
 1 -1.68039883 5.87816730 -3.82693767  
 6 -1.82172752 5.07141712 -4.54557105  
 1 -2.60317995 4.40738069 -4.18167217  
 1 -2.14808977 5.50296106 -5.49924672  
 8 -0.59470859 4.40091939 -4.67700825  
 6 -0.60024784 3.30472829 -5.53211408  
 1 -1.36628639 2.59175798 -5.24213605  
 1 -0.79833509 3.60882865 -6.57023978  
 6 0.74013012 2.64671307 -5.43631735  
 8 0.88226578 2.15419490 -4.14808958  
 6 2.08642756 1.48424901 -3.87848549  
 1 2.07221657 1.18733190 -2.83962137  
 1 2.95180380 2.12593048 -4.05757723  
 1 2.20156163 0.60000674 -4.51304749  
 1 1.51745477 3.38166223 -5.66875246  
 1 0.83020318 1.85292348 -6.19055362  
 1 -4.26418679 2.31738403 -4.88020343

|   |             |             |             |
|---|-------------|-------------|-------------|
| 6 | -3.91972149 | 1.56139657  | -5.58338611 |
| 1 | -4.74444592 | 0.86983771  | -5.79319401 |
| 1 | -3.66191324 | 2.05553182  | -6.52513667 |
| 8 | -2.81914529 | 0.90529272  | -5.01355154 |
| 6 | -2.16313925 | 0.02388519  | -5.86930986 |
| 1 | -2.78388835 | -0.85139731 | -6.09003387 |
| 1 | -1.94440442 | 0.50584190  | -6.83174562 |
| 6 | -0.88473524 | -0.41981550 | -5.23633697 |
| 8 | -1.13262324 | -1.38746185 | -4.25719992 |
| 6 | -0.00177297 | -1.60740287 | -3.44331648 |
| 1 | -0.26027847 | -2.37547605 | -2.72366568 |
| 1 | 0.29324106  | -0.70511961 | -2.92147641 |
| 1 | 0.84762814  | -1.96404736 | -4.03270002 |
| 1 | -0.40471270 | 0.44482894  | -4.79693809 |
| 1 | -0.21919027 | -0.83262698 | -6.00750894 |
| 1 | -2.17885818 | 0.05199147  | 1.05536399  |
| 6 | -2.74207670 | 0.07403940  | 1.97867649  |
| 1 | -2.51812725 | 0.99853758  | 2.50258577  |
| 1 | -3.81402551 | 0.05468128  | 1.76291490  |
| 8 | -2.37440194 | -1.05096432 | 2.75054893  |
| 6 | -2.81801552 | -0.99994787 | 4.06907085  |
| 1 | -2.35929645 | -0.15900160 | 4.58227989  |
| 1 | -3.90660402 | -0.87217200 | 4.13176882  |
| 6 | -2.41405894 | -2.29357252 | 4.70732786  |
| 8 | -1.08997841 | -2.57944291 | 4.37382948  |
| 6 | -0.11754270 | -1.99205016 | 5.21144337  |
| 1 | 0.85944167  | -2.29068902 | 4.84661838  |
| 1 | -0.23308316 | -2.34025824 | 6.24006694  |
| 1 | -0.18542224 | -0.91152440 | 5.19276897  |



|   |             |             |             |
|---|-------------|-------------|-------------|
| 1 | -3.01738941 | -3.11104990 | 4.30930041  |
| 1 | -2.57743873 | -2.26177753 | 5.79028705  |
| 1 | 3.44543864  | -0.58811373 | -1.17203498 |
| 6 | 4.10753021  | 0.14433871  | -0.71226215 |
| 1 | 5.14077521  | -0.06052585 | -1.04082941 |
| 8 | 4.03733790  | 0.09082353  | 0.66545947  |
| 8 | 3.75165938  | 1.43089155  | -1.05227491 |
| 6 | 4.22818379  | 2.26228365  | -0.03339710 |
| 1 | 3.45802801  | 2.96556365  | 0.24404744  |
| 1 | 5.10157375  | 2.82995598  | -0.37329120 |
| 6 | 4.58947511  | 1.30807282  | 1.07834321  |
| 1 | 4.19602654  | 1.59521237  | 2.04222267  |
| 1 | 5.67654872  | 1.21075189  | 1.16848481  |
| 1 | 1.47185712  | 3.57307039  | 1.57064020  |
| 6 | 1.98387458  | 4.12779597  | 2.35114716  |
| 1 | 2.13698660  | 5.16289311  | 2.02642246  |
| 8 | 3.20517653  | 3.54056013  | 2.64855869  |
| 8 | 1.28255117  | 4.09627230  | 3.55089044  |
| 6 | 2.22892379  | 4.46350047  | 4.50924252  |
| 1 | 2.29292901  | 5.55457568  | 4.59094016  |
| 1 | 1.95428021  | 4.07037109  | 5.48728025  |
| 6 | 3.52328050  | 3.89019852  | 3.96415631  |
| 1 | 4.34100371  | 4.61949260  | 3.99592440  |
| 1 | 3.85104180  | 2.99872198  | 4.49836557  |
| 1 | 1.75430864  | -1.70622441 | 2.49290182  |
| 6 | 1.45803938  | -1.56507601 | 1.45508499  |
| 1 | 1.75331268  | -0.58354848 | 1.11341096  |
| 8 | 0.08315390  | -1.72039785 | 1.31253578  |
| 8 | 1.98416257  | -2.55633818 | 0.65986310  |

|   |             |             |             |
|---|-------------|-------------|-------------|
| 6 | 1.20940336  | -2.54552535 | -0.50310303 |
| 1 | 1.66846636  | -1.93161746 | -1.27040575 |
| 1 | 1.12726630  | -3.56399222 | -0.88561112 |
| 6 | -0.11104251 | -1.95893834 | -0.05229544 |
| 1 | -0.32237537 | -1.03314692 | -0.56229662 |
| 1 | -0.94333589 | -2.63633474 | -0.17690612 |
| 1 | -3.92922587 | -2.23766466 | 1.28619874  |
| 6 | -3.79139966 | -3.31093761 | 1.34216334  |
| 1 | -4.31196779 | -3.68747009 | 2.22528818  |
| 1 | -4.22221474 | -3.78422788 | 0.46521881  |
| 8 | -2.40860497 | -3.57193205 | 1.42469378  |
| 6 | -2.09011570 | -4.93082740 | 1.34037850  |
| 1 | -2.49566870 | -5.44949819 | 2.21413248  |
| 1 | -2.51923837 | -5.38621259 | 0.44614713  |
| 6 | -0.60328040 | -5.05629685 | 1.33195744  |
| 8 | -0.11276678 | -4.29950953 | 2.38939269  |
| 6 | 1.19774974  | -4.63309786 | 2.78618482  |
| 1 | 1.50160948  | -3.94099455 | 3.56653330  |
| 1 | 1.89657695  | -4.55622041 | 1.95785243  |
| 1 | 1.23226337  | -5.65050164 | 3.18646550  |
| 1 | -0.20086848 | -4.69546508 | 0.38926043  |
| 1 | -0.32704532 | -6.11435783 | 1.41719979  |
| 3 | -1.11188474 | -2.58470707 | 2.45407992  |
| 9 | 0.95208420  | 2.41810357  | -0.99703104 |
| 5 | 0.91147249  | 1.29908386  | -0.21201450 |
| 9 | 1.71236222  | 1.47381068  | 0.90675945  |
| 9 | 1.35278427  | 0.19652631  | -0.92311633 |
| 9 | -0.38875519 | 1.04861856  | 0.22474341  |

### LiTFSI(DD)<sub>12</sub>

|   |             |             |             |
|---|-------------|-------------|-------------|
| 6 | -0.64721734 | -3.85588408 | -2.00925933 |
| 6 | 1.20753882  | -3.47051993 | -0.96112085 |
| 6 | 0.24913844  | -3.08896212 | -2.94449056 |
| 8 | 1.35912569  | -2.76285647 | -2.15075520 |
| 1 | -1.69202990 | -3.57480422 | -2.07659839 |
| 1 | -0.56303336 | -4.93302370 | -2.17855566 |
| 1 | -0.22315822 | -2.19124756 | -3.30412622 |
| 1 | 0.55993124  | -3.68833013 | -3.80493979 |
| 8 | -0.13426886 | -3.51642616 | -0.76752942 |
| 6 | 2.67204077  | 0.66579275  | -5.71743966 |
| 6 | 2.79174824  | -1.37031120 | -4.87562934 |
| 6 | 3.00500698  | 0.75353845  | -4.24031579 |
| 8 | 2.76713203  | -0.54217274 | -3.76142608 |
| 1 | 1.91139339  | 1.37838032  | -6.03002893 |
| 1 | 3.56342831  | 0.81750489  | -6.33640288 |
| 1 | 2.37829252  | 1.45333615  | -3.71261051 |
| 1 | 4.05223901  | 1.02547380  | -4.07835253 |
| 8 | 2.18473504  | -0.64085728 | -5.86789920 |
| 6 | 0.75653421  | -1.12219781 | 3.11275609  |
| 6 | 2.50803403  | -1.95579387 | 2.11812769  |
| 6 | 0.44842233  | -2.52963945 | 2.67215558  |
| 8 | 1.51539079  | -2.85666288 | 1.84434698  |
| 1 | -0.04473125 | -0.41573020 | 2.96876832  |
| 1 | 1.03658721  | -1.10772310 | 4.16874084  |
| 1 | -0.47045097 | -2.62052652 | 2.12525769  |
| 1 | 0.40682295  | -3.20466501 | 3.52352976  |
| 8 | 1.84667643  | -0.77247013 | 2.32441516  |

6 -1.21338228 -5.10348999 1.41195370  
 8 -1.51829386 -4.88549052 2.74460981  
 6 -0.67123749 -5.74123104 3.44895324  
 1 -0.47775455 -5.34226432 4.44815937  
 6 0.56066184 -5.81274915 2.56699956  
 8 0.17226739 -5.16793641 1.38802053  
 1 0.85283393 -6.85082542 2.37209111  
 1 1.41968579 -5.30152548 2.99349671  
 1 -1.12702091 -6.73020770 3.57224204  
 1 -1.63713746 -6.06189304 1.08122504  
 1 -1.58968695 -4.29442702 0.80106522  
 1 3.83512178 -1.60318444 -5.13476886  
 1 2.25884756 -2.30393401 -4.67911558  
 1 3.04824380 -2.24887874 3.02305821  
 1 3.20244996 -1.86257960 1.29665730  
 1 1.71015235 -2.97699727 -0.15323535  
 1 1.61125142 -4.47566542 -1.10457827  
 6 -1.94402260 6.15452324 -1.05091281  
 1 -0.88467362 6.01237335 -1.24334696  
 1 -2.06720498 6.95966681 -0.32442159  
 1 -2.42820554 6.46049277 -1.98597744  
 1 -2.27714639 4.10438600 -2.35782360  
 6 -2.33718353 3.84985576 -1.29957585  
 1 -1.39902267 3.37117387 -1.04073918  
 8 -2.54540112 4.99581492 -0.51937326  
 6 -3.47788208 2.89771581 -1.10284687  
 1 -3.59616535 2.69201684 -0.04292102  
 8 -3.24759002 1.72447312 -1.82369701  
 1 -4.39785281 3.38885989 -1.43368440

|   |             |             |             |
|---|-------------|-------------|-------------|
| 6 | -4.38225028 | 0.91741376  | -1.96168820 |
| 1 | -5.04483151 | 1.28677987  | -2.75404971 |
| 1 | -4.97027230 | 0.86546569  | -1.04799222 |
| 1 | -4.05625413 | -0.08654147 | -2.21946832 |
| 6 | 0.58252027  | 6.69358861  | 1.77852737  |
| 1 | 0.95183145  | 6.26464460  | 2.71463981  |
| 1 | -0.41786947 | 7.09279424  | 1.95186343  |
| 1 | 1.24932166  | 7.51899335  | 1.50396714  |
| 1 | 2.38587095  | 5.80371553  | -0.03953079 |
| 6 | 1.69555480  | 5.10055039  | 0.43954824  |
| 1 | 2.20311132  | 4.72422268  | 1.33777093  |
| 8 | 0.49451059  | 5.73042446  | 0.75654175  |
| 6 | 1.41528624  | 3.94564351  | -0.47512625 |
| 1 | 2.33084056  | 3.36753708  | -0.61375363 |
| 8 | 0.88407424  | 4.35311362  | -1.70576038 |
| 1 | 0.68631439  | 3.29916541  | -0.00193596 |
| 6 | 1.84357714  | 4.74269315  | -2.64820644 |
| 1 | 2.50668441  | 3.91636643  | -2.92177707 |
| 1 | 2.47202200  | 5.56325568  | -2.29013091 |
| 1 | 1.32696177  | 5.08209793  | -3.54823223 |
| 6 | 4.51230403  | -3.10109355 | -2.30629999 |
| 1 | 4.85211181  | -2.89901948 | -3.32474776 |
| 1 | 3.62870146  | -3.72394072 | -2.34328085 |
| 1 | 5.30288108  | -3.64260405 | -1.79234740 |
| 1 | 6.14097510  | -1.54890367 | -1.15587957 |
| 6 | 5.26491905  | -1.02743065 | -1.54591183 |
| 1 | 5.53322103  | -0.64856549 | -2.53928956 |
| 8 | 4.18606389  | -1.90826430 | -1.63624270 |
| 6 | 4.93826938  | 0.10619467  | -0.63594441 |

|   |             |             |             |
|---|-------------|-------------|-------------|
| 1 | 5.74729780  | 0.84911625  | -0.69615426 |
| 8 | 4.80283268  | -0.37887932 | 0.65783932  |
| 1 | 4.02309596  | 0.58093676  | -0.96643701 |
| 6 | 4.44932596  | 0.61255692  | 1.59866550  |
| 1 | 3.45870859  | 1.00716819  | 1.40145005  |
| 1 | 5.17146435  | 1.43455555  | 1.59252494  |
| 1 | 4.45525133  | 0.15598213  | 2.58592374  |
| 3 | 2.42080837  | -1.24545569 | -2.03594357 |
| 1 | -3.27295205 | -2.05584729 | -2.91915987 |
| 6 | -3.26026713 | -2.12862166 | -4.00555151 |
| 1 | -4.14702197 | -1.61907396 | -4.39465649 |
| 1 | -3.31878076 | -3.18066123 | -4.29465091 |
| 8 | -2.07341176 | -1.59534286 | -4.54237388 |
| 6 | -1.88095727 | -0.23740026 | -4.23940568 |
| 6 | -0.62424913 | 0.22357744  | -4.91964485 |
| 1 | -0.83574673 | 0.48957185  | -5.95830118 |
| 1 | -1.78598839 | -0.10540359 | -3.17644269 |
| 1 | 0.07125332  | -0.60413496 | -4.93816384 |
| 1 | -2.73878452 | 0.35263446  | -4.56782898 |
| 8 | 0.01462444  | 1.27699289  | -4.26313013 |
| 6 | -0.70829440 | 2.47719350  | -4.26829624 |
| 1 | -1.68902079 | 2.35882726  | -3.82052564 |
| 1 | -0.84305990 | 2.85845743  | -5.28509229 |
| 1 | -0.15105926 | 3.20742104  | -3.69037064 |
| 1 | -3.09582134 | 5.69120049  | 1.97907389  |
| 6 | -3.36255281 | 4.92761036  | 2.71175722  |
| 1 | -4.03161567 | 4.22144361  | 2.22901461  |
| 1 | -3.89505654 | 5.40426274  | 3.53848050  |
| 8 | -2.22446537 | 4.29312433  | 3.24167685  |

|   |             |             |            |
|---|-------------|-------------|------------|
| 6 | -1.42704873 | 3.68148088  | 2.26962264 |
| 6 | -0.16471078 | 3.20012399  | 2.89468760 |
| 1 | 0.29033726  | 4.02915330  | 3.44045663 |
| 1 | -1.18478073 | 4.37837142  | 1.47113971 |
| 1 | 0.53165212  | 2.87917002  | 2.12262394 |
| 1 | -1.94609223 | 2.84740749  | 1.83231811 |
| 8 | -0.41820050 | 2.13680387  | 3.76859769 |
| 6 | 0.70664604  | 1.79552267  | 4.53664987 |
| 1 | 1.06920383  | 2.64759107  | 5.12194090 |
| 1 | 1.52959124  | 1.43807039  | 3.91417321 |
| 1 | 0.42272446  | 1.00499231  | 5.23358074 |
| 8 | 3.70972829  | -4.72384280 | 2.44765364 |
| 6 | 5.02007063  | -4.23226132 | 2.42174432 |
| 1 | 5.15394250  | -3.49857953 | 3.22001128 |
| 1 | 5.74687945  | -5.03577491 | 2.58778895 |
| 6 | 5.16079648  | -3.64669643 | 1.02279589 |
| 1 | 5.34067388  | -2.57503779 | 1.00996465 |
| 1 | 5.97699892  | -4.13441932 | 0.47943889 |
| 8 | 3.92857827  | -3.91813370 | 0.41962567 |
| 6 | 3.39591880  | -4.98521830 | 1.12743315 |
| 1 | 3.87490311  | -5.92198740 | 0.80279654 |
| 1 | 2.32229409  | -5.05478942 | 0.98416347 |
| 8 | -4.22603651 | -3.62279093 | 1.84772025 |
| 6 | -4.06789134 | -3.54156456 | 3.23231240 |
| 1 | -5.04139998 | -3.52785453 | 3.73227818 |
| 1 | -3.49027261 | -4.38127231 | 3.60428251 |
| 6 | -3.40539775 | -2.20835167 | 3.35023531 |
| 1 | -3.49468510 | -1.73949097 | 4.33352586 |
| 1 | -2.35791858 | -2.29083313 | 3.08708792 |

|    |             |             |             |
|----|-------------|-------------|-------------|
| 8  | -4.09206916 | -1.46380148 | 2.39636227  |
| 6  | -4.60236692 | -2.34929449 | 1.45391003  |
| 1  | -4.22211751 | -2.16073998 | 0.45251502  |
| 1  | -5.69972025 | -2.23952714 | 1.44326556  |
| 8  | -5.61149150 | 2.21505420  | 3.28278421  |
| 6  | -4.65383473 | 2.12518777  | 4.31075882  |
| 1  | -4.42468424 | 3.12656781  | 4.67878442  |
| 1  | -5.03585920 | 1.53559811  | 5.15210106  |
| 6  | -3.46780801 | 1.48408982  | 3.63976462  |
| 1  | -2.50970801 | 1.86831363  | 3.95966928  |
| 1  | -3.49181290 | 0.40883198  | 3.78007268  |
| 8  | -3.69322635 | 1.77740455  | 2.29811225  |
| 6  | -5.05109012 | 1.62101101  | 2.15579980  |
| 1  | -5.31178419 | 0.55970899  | 2.11962564  |
| 1  | -5.41077751 | 2.10923967  | 1.24175449  |
| 9  | 0.61567552  | -0.36062728 | -2.39045858 |
| 6  | 0.42464608  | 0.68104375  | -1.64342049 |
| 9  | -0.74468020 | 1.14950821  | -1.75735527 |
| 16 | 0.93007749  | 0.10689235  | -0.00596273 |
| 9  | 1.30654144  | 1.58657350  | -1.96461215 |
| 7  | 0.15391002  | -1.19230421 | 0.30828096  |
| 8  | 2.25636294  | -0.35672755 | -0.39873322 |
| 8  | 0.82053959  | 1.20503939  | 0.92240648  |
| 16 | -1.36105131 | -1.24740018 | -0.06074091 |
| 8  | -1.93943532 | -2.32614686 | 0.70267543  |
| 8  | -1.63001074 | -1.20267099 | -1.48264339 |
| 9  | -1.65991890 | 1.31446070  | 0.39846359  |
| 6  | -2.10930806 | 0.17451430  | 0.76222311  |
| 9  | -1.84683485 | -0.01221255 | 2.01072542  |



9 -3.36665577 0.08122034 0.49555064

Li<sup>+</sup>TFSI<sup>-</sup>(DD)<sub>12</sub>

1 -2.48662891 -5.32834105 -2.20359616  
6 -1.64569680 -5.64792905 -1.57896327  
1 -1.56031653 -6.74580083 -1.64272192  
8 -1.82993782 -5.25783399 -0.26959409  
8 -0.46460440 -5.05181731 -1.97858540  
6 0.38563729 -5.14296525 -0.86967004  
1 0.99529027 -6.05058185 -0.93256472  
1 1.04230851 -4.28438639 -0.83910638  
6 -0.55751853 -5.19668947 0.31140375  
1 -0.37612349 -6.08103953 0.93177088  
1 -0.49737311 -4.31623277 0.93821366  
1 3.37760239 3.25833550 0.57528005  
6 3.15046002 2.47177616 -0.15921085  
1 3.28549532 1.50051934 0.29462888  
8 3.94820715 2.60909823 -1.26869547  
8 1.83478675 2.57995074 -0.60486110  
6 1.82671450 2.26199046 -1.97369656  
1 1.14883082 1.45053752 -2.19150479  
1 1.50368081 3.14845463 -2.52547498  
6 3.25768483 1.92186437 -2.27628967  
1 3.41368439 0.85756218 -2.19063501  
1 3.60115670 2.27311445 -3.25150109  
1 -6.66539605 1.67776795 2.10005740  
6 -5.75179432 1.15028225 1.77556845  
1 -5.95052781 0.66335718 0.81303063

|   |             |             |             |
|---|-------------|-------------|-------------|
| 8 | -5.35869777 | 0.19793148  | 2.69610559  |
| 8 | -4.71578182 | 2.08696850  | 1.68151786  |
| 6 | -3.70189029 | 1.70912086  | 2.57820072  |
| 1 | -2.93278955 | 1.15732311  | 2.05779525  |
| 1 | -3.25966383 | 2.59221563  | 3.02789255  |
| 6 | -4.43828506 | 0.82601163  | 3.54027639  |
| 1 | -3.81725453 | 0.08051157  | 4.04076779  |
| 1 | -4.95237281 | 1.41654116  | 4.30578161  |
| 1 | 3.25329800  | -4.73951000 | 4.70336713  |
| 6 | 3.15857438  | -3.77989854 | 4.16721556  |
| 1 | 3.83883357  | -3.05768040 | 4.61760914  |
| 8 | 1.85649012  | -3.33303567 | 4.21668032  |
| 8 | 3.44299824  | -3.96432811 | 2.83076358  |
| 6 | 2.25983739  | -4.37537881 | 2.21589290  |
| 1 | 2.11987191  | -3.83723477 | 1.28818362  |
| 1 | 2.29896755  | -5.44433706 | 1.98000221  |
| 6 | 1.18754419  | -4.07407215 | 3.23796332  |
| 1 | 0.35905975  | -3.50183722 | 2.83790248  |
| 1 | 0.79120702  | -4.99938568 | 3.66942365  |
| 1 | -2.62860590 | -3.10800840 | -2.82957845 |
| 6 | -2.14893456 | -2.83114432 | -3.75358337 |
| 1 | -1.32861686 | -3.51946997 | -3.94850672 |
| 1 | -2.87099082 | -2.92590068 | -4.56958044 |
| 8 | -1.68753923 | -1.50906978 | -3.62934185 |
| 6 | -1.24089036 | -0.97913018 | -4.83341493 |
| 1 | -0.51251511 | -1.64134001 | -5.30711513 |
| 1 | -2.07615152 | -0.87446273 | -5.54164110 |
| 6 | -0.60726382 | 0.35659060  | -4.60175239 |
| 8 | 0.61891427  | 0.23713147  | -3.95358569 |

|   |             |             |             |
|---|-------------|-------------|-------------|
| 6 | 1.72737844  | 0.23673673  | -4.81757621 |
| 1 | 2.61247535  | 0.02950837  | -4.22908022 |
| 1 | 1.84044820  | 1.20268878  | -5.32145800 |
| 1 | 1.63995926  | -0.52673231 | -5.59373976 |
| 1 | -1.26100079 | 0.94284605  | -3.97055142 |
| 1 | -0.50123586 | 0.87656578  | -5.56114161 |
| 1 | -5.57061312 | 3.53189745  | 0.27745055  |
| 6 | -5.65409901 | 4.17538452  | -0.58804538 |
| 1 | -6.04216054 | 3.59669196  | -1.42791290 |
| 1 | -6.35960604 | 4.98474078  | -0.38385237 |
| 8 | -4.37047124 | 4.69111682  | -0.88092116 |
| 6 | -4.32210422 | 5.37740884  | -2.09779713 |
| 1 | -4.59689225 | 4.70828733  | -2.91767988 |
| 1 | -5.02593303 | 6.21960647  | -2.11693080 |
| 6 | -2.91373259 | 5.84648789  | -2.27734512 |
| 8 | -2.07841482 | 4.74587774  | -2.11040473 |
| 6 | -1.46146916 | 4.26312532  | -3.28380407 |
| 1 | -0.89613707 | 3.37616836  | -3.02815120 |
| 1 | -0.79344948 | 5.01716594  | -3.70721980 |
| 1 | -2.20366483 | 4.00637013  | -4.04147970 |
| 1 | -2.67040415 | 6.58218554  | -1.50685612 |
| 1 | -2.79183062 | 6.33936570  | -3.24741223 |
| 1 | 3.48522434  | -0.19202197 | 4.16424297  |
| 6 | 4.55505565  | -0.33377230 | 4.10978755  |
| 1 | 5.00681313  | 0.57044102  | 3.69877437  |
| 1 | 4.95305860  | -0.46854025 | 5.12058737  |
| 8 | 4.81007607  | -1.45126079 | 3.30592744  |
| 6 | 6.15750027  | -1.74713324 | 3.16288630  |
| 1 | 6.66138598  | -0.99602176 | 2.54982821  |

|   |             |             |             |
|---|-------------|-------------|-------------|
| 1 | 6.65744795  | -1.74635207 | 4.14123807  |
| 6 | 6.32757201  | -3.09085899 | 2.53148346  |
| 8 | 6.06594000  | -3.02280803 | 1.16605872  |
| 6 | 5.71983518  | -4.25837697 | 0.60020837  |
| 1 | 5.57621835  | -4.11527415 | -0.46923819 |
| 1 | 4.80196007  | -4.64773541 | 1.03198144  |
| 1 | 6.50850876  | -5.00515800 | 0.74126154  |
| 1 | 5.65127892  | -3.78205364 | 3.02215699  |
| 1 | 7.35468051  | -3.44689342 | 2.70361059  |
| 1 | 5.47169732  | 0.89242697  | 0.36828440  |
| 6 | 5.83576907  | 0.09267256  | -0.26867036 |
| 1 | 6.56166661  | 0.51984516  | -0.96723283 |
| 1 | 6.34918009  | -0.64337728 | 0.34807126  |
| 8 | 4.74436085  | -0.47088760 | -0.93210843 |
| 6 | 5.08852597  | -1.49610809 | -1.79725665 |
| 1 | 5.46422441  | -1.08680235 | -2.74182969 |
| 1 | 5.88889147  | -2.10821268 | -1.37139138 |
| 6 | 3.92331889  | -2.38357146 | -2.08870704 |
| 8 | 2.96227056  | -1.71570490 | -2.83452119 |
| 6 | 1.88611472  | -2.54147799 | -3.20296894 |
| 1 | 1.07546166  | -1.91374630 | -3.53577275 |
| 1 | 1.53311424  | -3.13198091 | -2.37163024 |
| 1 | 2.17045315  | -3.22452546 | -4.01037796 |
| 1 | 3.50096158  | -2.73951748 | -1.15867728 |
| 1 | 4.29272908  | -3.26482008 | -2.63270069 |
| 1 | -4.67353409 | -1.74491442 | -2.23348348 |
| 6 | -4.78686472 | -2.20379067 | -1.24325290 |
| 1 | -5.76271273 | -2.71815169 | -1.21378652 |
| 8 | -4.72494163 | -1.25052288 | -0.24458926 |

|   |             |             |             |
|---|-------------|-------------|-------------|
| 8 | -3.76799963 | -3.09232455 | -0.99116975 |
| 6 | -3.69758308 | -3.21243232 | 0.39790328  |
| 1 | -2.67140244 | -3.33488992 | 0.70605245  |
| 1 | -4.25357501 | -4.09006436 | 0.73403387  |
| 6 | -4.32285363 | -1.93457133 | 0.91212573  |
| 1 | -3.62751653 | -1.31456553 | 1.45673864  |
| 1 | -5.18378514 | -2.14068733 | 1.55011233  |
| 1 | 1.36603861  | 2.58929616  | 3.17561084  |
| 6 | 1.06566670  | 1.67379019  | 2.63700863  |
| 1 | 1.43399953  | 1.73628961  | 1.61565829  |
| 8 | -0.31169086 | 1.54604309  | 2.62216562  |
| 8 | 1.56999333  | 0.58558277  | 3.31273440  |
| 6 | 0.52252963  | -0.16264904 | 3.83318228  |
| 1 | 0.35295308  | -1.05101091 | 3.24751660  |
| 1 | 0.74963215  | -0.47509901 | 4.85491566  |
| 6 | -0.63935556 | 0.77313061  | 3.73107440  |
| 1 | -1.58968250 | 0.27494319  | 3.57137523  |
| 1 | -0.71591307 | 1.39943945  | 4.62584722  |
| 1 | -0.40843726 | 2.70097196  | -0.68891816 |
| 6 | -1.14991162 | 1.91474848  | -0.66371437 |
| 1 | -0.80012072 | 1.13256697  | -0.01497891 |
| 8 | -1.40035572 | 1.42783174  | -1.92937831 |
| 8 | -2.35813437 | 2.41591657  | -0.20591990 |
| 6 | -3.30857666 | 1.54268714  | -0.73642602 |
| 1 | -3.31792970 | 0.62794284  | -0.17475548 |
| 1 | -4.28901380 | 1.99427463  | -0.71075555 |
| 6 | -2.77367775 | 1.33092562  | -2.11016109 |
| 1 | -3.04945229 | 0.38333856  | -2.55831099 |
| 1 | -3.10806435 | 2.12692217  | -2.77994300 |

|    |             |             |             |
|----|-------------|-------------|-------------|
| 1  | -4.95800165 | 4.64258873  | 1.88486253  |
| 6  | -4.09784351 | 5.11991464  | 2.33412181  |
| 1  | -4.17966816 | 6.20399537  | 2.21832310  |
| 1  | -4.09203161 | 4.89511012  | 3.40168432  |
| 8  | -2.93608039 | 4.63002051  | 1.70456836  |
| 6  | -1.76150165 | 5.01211794  | 2.36056110  |
| 1  | -1.70546220 | 6.10335967  | 2.41358634  |
| 1  | -1.73419007 | 4.63411541  | 3.38938466  |
| 6  | -0.61331605 | 4.48019294  | 1.57443117  |
| 8  | -0.80190993 | 4.89389468  | 0.25429245  |
| 6  | 0.35201384  | 5.40221093  | -0.38296593 |
| 1  | 0.06985597  | 5.71478224  | -1.38252794 |
| 1  | 1.12686271  | 4.64520452  | -0.44664329 |
| 1  | 0.73879750  | 6.26850253  | 0.15911265  |
| 1  | -0.60007527 | 3.39716094  | 1.62273257  |
| 1  | 0.32683379  | 4.84516678  | 1.99573325  |
| 3  | -2.57461670 | 4.25170420  | -0.20608168 |
| 9  | -2.29290270 | -1.05713544 | -1.12077006 |
| 6  | -1.11293378 | -1.49710114 | -0.86219145 |
| 9  | -0.24572131 | -0.84091040 | -1.54468369 |
| 16 | -0.83713935 | -1.13291754 | 0.89919985  |
| 8  | -1.91031620 | -0.21371166 | 1.22605044  |
| 7  | 0.48050739  | -0.29533964 | 0.86866232  |
| 8  | -0.80311879 | -2.37432791 | 1.65273933  |
| 9  | -1.05439040 | -2.75323898 | -1.09125516 |
| 8  | 1.34066203  | -2.39851852 | -0.28864955 |
| 16 | 1.64519614  | -1.03174205 | 0.09788932  |
| 8  | 2.23171119  | -0.11882894 | -0.83082125 |
| 6  | 2.88646436  | -1.23200083 | 1.37558193  |

|   |            |             |            |
|---|------------|-------------|------------|
| 9 | 2.31692819 | -1.67193947 | 2.43515122 |
| 9 | 3.41998382 | -0.06883114 | 1.58431184 |
| 9 | 3.76636224 | -2.06446758 | 0.95917764 |

# Li<sup>+</sup>(DME)<sub>4</sub>

|   |             |             |             |
|---|-------------|-------------|-------------|
| 3 | 0.08100722  | -0.42347802 | 0.32973343  |
| 1 | -1.33637292 | 1.22748276  | 3.65281730  |
| 1 | -0.33844122 | 1.98331579  | 2.40532541  |
| 6 | -1.22347832 | 1.38235641  | 2.57752659  |
| 8 | -1.06721915 | 0.15669789  | 1.90530716  |
| 1 | -2.09741728 | 1.92028268  | 2.21859397  |
| 6 | -2.08147993 | -0.75676988 | 2.18054141  |
| 1 | -2.93650493 | -0.56337102 | 1.53565217  |
| 1 | -2.43440431 | -0.67980385 | 3.21521483  |
| 6 | -1.53319097 | -2.12248929 | 1.94271198  |
| 1 | -2.33484490 | -2.86616862 | 2.02288792  |
| 1 | -0.79112901 | -2.36791219 | 2.70470289  |
| 8 | -0.93621512 | -2.12678545 | 0.68448218  |
| 1 | -0.38390356 | -3.30347556 | -0.87333673 |
| 1 | -0.24008104 | -4.07890272 | 0.71118360  |
| 6 | -0.84475635 | -3.40601302 | 0.10088979  |
| 1 | -1.83343397 | -3.85596870 | -0.01566901 |
| 1 | 0.26863188  | 3.02063463  | -1.05654240 |
| 1 | -1.01857442 | 2.26786443  | -0.10562195 |
| 6 | 0.01832757  | 2.57342923  | -0.09593677 |
| 8 | 0.81241192  | 1.44054763  | 0.16795060  |
| 1 | 0.16222480  | 3.34132884  | 0.66516922  |
| 6 | 2.16548378  | 1.73848736  | 0.36921002  |

|   |             |             |             |
|---|-------------|-------------|-------------|
| 1 | 2.61324418  | 0.86299929  | 0.82126178  |
| 1 | 2.28148447  | 2.57606113  | 1.06705153  |
| 6 | 2.88211094  | 2.06265052  | -0.90695544 |
| 1 | 3.93229002  | 2.28457963  | -0.67335011 |
| 1 | 2.46470165  | 2.96867940  | -1.35576568 |
| 8 | 2.76845182  | 0.98368517  | -1.78728277 |
| 1 | 3.37505856  | 0.26938411  | -3.59882181 |
| 1 | 3.22022893  | 2.03657461  | -3.52872919 |
| 6 | 3.53036366  | 1.14823907  | -2.97153430 |
| 1 | 4.59774507  | 1.24020456  | -2.75356389 |
| 1 | 1.65029581  | -2.91372543 | -2.32557594 |
| 1 | 0.31271966  | -1.78222037 | -2.55749750 |
| 6 | 1.32415143  | -1.88131666 | -2.18181246 |
| 8 | 1.32813964  | -1.53675508 | -0.81800981 |
| 1 | 1.98401599  | -1.23385460 | -2.75380221 |
| 6 | 2.54857095  | -1.77592521 | -0.19172787 |
| 1 | 3.21800964  | -0.93343923 | -0.35511536 |
| 1 | 3.04792999  | -2.66617227 | -0.59053577 |
| 6 | 2.27774359  | -1.96662005 | 1.26168178  |
| 1 | 3.22321766  | -2.03211768 | 1.81294414  |
| 1 | 1.74602828  | -2.90580050 | 1.42492599  |
| 8 | 1.49187172  | -0.89950218 | 1.68966028  |
| 1 | 0.95569016  | 0.20948619  | 3.30201495  |
| 1 | 1.24907348  | -1.49920367 | 3.65887687  |
| 6 | 1.58333264  | -0.64210953 | 3.07196860  |
| 1 | 2.61238208  | -0.41748894 | 3.36211933  |
| 1 | -1.11646633 | 1.58885163  | -2.55460480 |
| 1 | 0.45235897  | 0.81082524  | -2.30748820 |
| 6 | -0.60845850 | 0.63546862  | -2.41958618 |



|   |             |             |             |
|---|-------------|-------------|-------------|
| 8 | -1.07084190 | -0.03757321 | -1.27205325 |
| 1 | -0.78432202 | 0.04541934  | -3.31996418 |
| 6 | -2.40065546 | -0.46463004 | -1.37033666 |
| 1 | -2.55720554 | -1.17943679 | -0.57306956 |
| 1 | -2.57682668 | -0.97634935 | -2.32375409 |
| 6 | -3.38130328 | 0.66061474  | -1.23032864 |
| 1 | -4.39781161 | 0.25319878  | -1.31629539 |
| 1 | -3.26101396 | 1.37263001  | -2.05198366 |
| 8 | -3.18379900 | 1.29424050  | -0.00085183 |
| 1 | -3.92152170 | 2.72952240  | 1.24625367  |
| 1 | -4.16338580 | 3.07104232  | -0.47909060 |
| 6 | -4.15981290 | 2.28357898  | 0.27962677  |
| 1 | -5.16442610 | 1.85501521  | 0.32830782  |

### Li<sup>+</sup>(DME)<sub>3</sub>

|   |             |             |             |
|---|-------------|-------------|-------------|
| 3 | 0.00547735  | 0.00094734  | -0.00598821 |
| 1 | 0.09474827  | 1.56975353  | 3.57372897  |
| 1 | 0.74708972  | 2.23009997  | 2.05961721  |
| 6 | -0.12601162 | 1.78492356  | 2.52555597  |
| 8 | -0.44243082 | 0.60390247  | 1.82224900  |
| 1 | -0.95104270 | 2.49909562  | 2.49545670  |
| 6 | -1.58688399 | -0.04632875 | 2.27833888  |
| 1 | -2.47709965 | 0.45322565  | 1.89041127  |
| 1 | -1.66222626 | -0.03335813 | 3.37237865  |
| 6 | -1.53929168 | -1.45779783 | 1.79261923  |
| 1 | -2.48440213 | -1.96220428 | 2.02742982  |
| 1 | -0.74753242 | -2.00619263 | 2.30719568  |
| 8 | -1.28415761 | -1.43137873 | 0.42340227  |

|   |             |             |             |
|---|-------------|-------------|-------------|
| 1 | -1.34830192 | -2.50214371 | -1.29828799 |
| 1 | -1.08430108 | -3.47907653 | 0.15828613  |
| 6 | -1.61937095 | -2.62174601 | -0.25439944 |
| 1 | -2.69001617 | -2.82701474 | -0.18169683 |
| 1 | -3.16753552 | 1.29266219  | -1.91040752 |
| 1 | -2.99900017 | -0.14472503 | -0.88158795 |
| 6 | -2.79746161 | 0.91914511  | -0.95269898 |
| 8 | -1.40471763 | 1.10905647  | -0.83814263 |
| 1 | -3.33663217 | 1.43875798  | -0.15844639 |
| 6 | -1.00228311 | 2.44228329  | -0.87574684 |
| 1 | -1.17993746 | 2.91035333  | 0.09461513  |
| 1 | -1.56168395 | 3.02241194  | -1.61963686 |
| 6 | 0.45436916  | 2.47458350  | -1.20357580 |
| 1 | 0.83097071  | 3.50114669  | -1.11767194 |
| 1 | 0.61321573  | 2.16128836  | -2.23774231 |
| 8 | 1.10882584  | 1.60122039  | -0.33786749 |
| 1 | 2.91033928  | 1.05414526  | 0.41780104  |
| 1 | 2.97596247  | 1.68739740  | -1.23757185 |
| 6 | 2.50330414  | 1.79755102  | -0.25976587 |
| 1 | 2.73909854  | 2.79557585  | 0.11706026  |
| 1 | -0.04580124 | -1.50084356 | -3.61912907 |
| 1 | -0.94610551 | -0.11242056 | -2.97536085 |
| 6 | 0.03184789  | -0.57826569 | -3.03907719 |
| 8 | 0.47702182  | -0.84032080 | -1.72666135 |
| 1 | 0.71435207  | 0.09267275  | -3.56407472 |
| 6 | 1.74336347  | -1.41617669 | -1.65469043 |
| 1 | 2.50789181  | -0.65482158 | -1.82410222 |
| 1 | 1.88883823  | -2.19201013 | -2.41626326 |
| 6 | 1.90302660  | -2.00940221 | -0.29341612 |

|   |            |             |             |
|---|------------|-------------|-------------|
| 1 | 2.93385177 | -2.36002146 | -0.16149363 |
| 1 | 1.25342131 | -2.88032255 | -0.18439085 |
| 8 | 1.55397692 | -1.03832334 | 0.64246932  |
| 1 | 1.67831999 | -0.49347415 | 2.59275626  |
| 1 | 1.66373499 | -2.24668792 | 2.32516916  |
| 6 | 2.02956025 | -1.29076321 | 1.94591010  |
| 1 | 3.12161908 | -1.31637945 | 1.96744354  |

### Li<sup>+</sup>(DOL)(DME)<sub>3</sub>

|   |             |             |             |
|---|-------------|-------------|-------------|
| 3 | 0.00000000  | 0.00000000  | 0.00000000  |
| 1 | 0.00000000  | 0.00000000  | 4.28921682  |
| 1 | 1.34971151  | 0.00000000  | 3.10554617  |
| 6 | 0.35612737  | 0.40626006  | 3.32714498  |
| 8 | -0.50909741 | 0.00224195  | 2.26011010  |
| 1 | 0.41439686  | 1.50544534  | 3.39480258  |
| 6 | -1.85001910 | 0.46468971  | 2.47011843  |
| 1 | -1.88863153 | 1.56049814  | 2.33208269  |
| 1 | -2.18390028 | 0.22533358  | 3.49654568  |
| 6 | -2.75808365 | -0.24517314 | 1.48851432  |
| 1 | -3.78867754 | 0.13758614  | 1.60692543  |
| 1 | -2.76518917 | -1.33400686 | 1.68461598  |
| 8 | -2.28244693 | -0.00002418 | 0.15982785  |
| 1 | -2.73153935 | -0.34308931 | -1.80460861 |
| 1 | -3.32429084 | -1.61189798 | -0.68663570 |
| 6 | -3.18267167 | -0.52555232 | -0.82408968 |
| 1 | -4.16239891 | -0.02286418 | -0.76037854 |
| 1 | 3.28863192  | 2.19555983  | 0.40016722  |
| 1 | 1.72151202  | 2.24594433  | 1.26629365  |

|   |             |             |             |
|---|-------------|-------------|-------------|
| 6 | 2.61348393  | 1.63783764  | 1.06899670  |
| 8 | 2.16199482  | 0.41541461  | 0.47050201  |
| 1 | 3.14324554  | 1.43446993  | 2.01625739  |
| 6 | 3.22584944  | -0.52265585 | 0.23523962  |
| 1 | 2.72689480  | -1.47707094 | 0.01946261  |
| 1 | 3.82838860  | -0.64153116 | 1.15558245  |
| 6 | 4.15964768  | -0.15725087 | -0.91072294 |
| 1 | 4.95789619  | -0.92617724 | -0.94840099 |
| 1 | 4.65896827  | 0.81652825  | -0.73788853 |
| 8 | 3.43211088  | -0.12806729 | -2.13496430 |
| 1 | 3.66282951  | 0.13777036  | -4.14854253 |
| 1 | 4.78972523  | 1.11257222  | -3.14881819 |
| 6 | 4.28960102  | 0.13224850  | -3.24782186 |
| 1 | 5.06157259  | -0.65114601 | -3.35045995 |
| 1 | -0.57918751 | -0.69013308 | -4.19453779 |
| 1 | -0.66020178 | 0.81608921  | -3.22124448 |
| 6 | -0.11693121 | -0.12455648 | -3.36754760 |
| 8 | -0.21263024 | -0.85864425 | -2.14183348 |
| 1 | 0.93491852  | 0.09270336  | -3.61765973 |
| 6 | 0.44751037  | -2.12784416 | -2.23910688 |
| 1 | 1.54124706  | -1.97347924 | -2.27464954 |
| 1 | 0.13443715  | -2.65543370 | -3.15886380 |
| 6 | 0.04934170  | -2.96486803 | -1.04221420 |
| 1 | 0.58692865  | -3.93037709 | -1.08085141 |
| 1 | -1.03783198 | -3.16960069 | -1.05694038 |
| 8 | 0.38733175  | -2.25117124 | 0.15285050  |
| 1 | 0.40346829  | -2.42926908 | 2.18940078  |
| 1 | -0.89098448 | -3.36997586 | 1.38295563  |
| 6 | 0.16435139  | -3.05137919 | 1.32105633  |

|   |             |             |             |
|---|-------------|-------------|-------------|
| 1 | 0.81127503  | -3.94464194 | 1.30788277  |
| 8 | -0.04194514 | 1.92750669  | -0.75356389 |
| 6 | 0.75477501  | 2.36674589  | -1.88196529 |
| 8 | -0.15649404 | 2.56989678  | -2.92696242 |
| 1 | 1.45948662  | 1.57006544  | -2.14716838 |
| 1 | 1.27399547  | 3.30506392  | -1.60695306 |
| 6 | -1.22379047 | 3.28979193  | -2.28610692 |
| 1 | -2.12742794 | 3.17919228  | -2.89577384 |
| 1 | -0.96304902 | 4.35811073  | -2.19867943 |
| 6 | -1.32072071 | 2.61346521  | -0.89658536 |
| 1 | -2.11496107 | 1.85554774  | -0.85241049 |
| 1 | -1.44829960 | 3.33819550  | -0.08042130 |

### Li<sup>+</sup>(DOL)<sub>2</sub>(DME)<sub>2</sub>

|   |             |             |             |
|---|-------------|-------------|-------------|
| 1 | 0.93199739  | 3.37566051  | 1.13694464  |
| 6 | 0.23473140  | 2.97238396  | 0.38879651  |
| 1 | -0.73019378 | 2.80166957  | 0.86138147  |
| 8 | 0.75561100  | 1.78758549  | -0.13271737 |
| 8 | 0.12164531  | 3.80955973  | -0.69542276 |
| 6 | 1.32845079  | 3.63948732  | -1.39121835 |
| 1 | 1.18406785  | 3.86398728  | -2.45037775 |
| 1 | 2.10138133  | 4.31137889  | -1.00554081 |
| 6 | 1.68033441  | 2.18402110  | -1.11118233 |
| 1 | 1.57258633  | 1.54562457  | -1.98168664 |
| 1 | 2.70438534  | 2.08083516  | -0.74338662 |
| 3 | -0.06738601 | -0.01457927 | 0.01920722  |
| 1 | -2.06255035 | -3.15259739 | -0.68206009 |
| 6 | -1.00482306 | -2.86390208 | -0.60963408 |

|   |             |             |             |
|---|-------------|-------------|-------------|
| 1 | -0.64987449 | -2.57102703 | -1.59586008 |
| 8 | -0.24585352 | -3.87709370 | -0.07295075 |
| 8 | -0.86924985 | -1.82390431 | 0.30534457  |
| 6 | -0.93849513 | -2.43116590 | 1.56630650  |
| 1 | -0.23640380 | -1.94779536 | 2.23598234  |
| 1 | -1.93874976 | -2.32764629 | 1.99211199  |
| 6 | -0.59981616 | -3.89003490 | 1.28632593  |
| 1 | 0.23071436  | -4.27417246 | 1.88227042  |
| 1 | -1.46461403 | -4.53746309 | 1.45957601  |
| 1 | -1.80775744 | 0.18136640  | 3.49797010  |
| 1 | -0.09073859 | 0.45064205  | 3.14149091  |
| 6 | -1.10393504 | 0.75316708  | 2.89000937  |
| 8 | -1.30175867 | 0.51421023  | 1.51379401  |
| 1 | -1.23146734 | 1.81012143  | 3.13498028  |
| 6 | -2.57266791 | 0.86533672  | 1.05574701  |
| 1 | -2.67010898 | 1.95411632  | 1.02622067  |
| 1 | -3.36292320 | 0.49894748  | 1.72117435  |
| 6 | -2.74404859 | 0.28930178  | -0.31330383 |
| 1 | -3.66168773 | 0.67375511  | -0.77001821 |
| 1 | -2.83879006 | -0.78966160 | -0.24702399 |
| 8 | -1.60714559 | 0.57861670  | -1.07012416 |
| 1 | -0.83387885 | 1.79663691  | -2.50079920 |
| 1 | -2.52474138 | 1.33721199  | -2.76389657 |
| 6 | -1.78423857 | 1.61666162  | -2.01101215 |
| 1 | -2.10775352 | 2.53919193  | -1.53391177 |
| 1 | 3.21879828  | 0.55196771  | 1.17403554  |
| 1 | 1.89383825  | 0.99286497  | 2.25742509  |
| 6 | 2.42734447  | 0.15806998  | 1.81158628  |
| 8 | 1.50798853  | -0.61907636 | 1.07812942  |

|   |             |             |             |
|---|-------------|-------------|-------------|
| 1 | 2.89245397  | -0.42969970 | 2.60680262  |
| 6 | 2.08926169  | -1.68121669 | 0.37907111  |
| 1 | 1.43531696  | -2.53733094 | 0.46342293  |
| 1 | 3.06442700  | -1.96439732 | 0.78606112  |
| 6 | 2.21544672  | -1.30595096 | -1.05901874 |
| 1 | 2.53422542  | -2.17608913 | -1.64330018 |
| 1 | 2.97775226  | -0.53403554 | -1.19347791 |
| 8 | 0.97458494  | -0.82091795 | -1.47672161 |
| 1 | -0.20062088 | -0.43763457 | -3.08587744 |
| 1 | 1.53609492  | -0.23323917 | -3.38768436 |
| 6 | 0.78644896  | -0.83914180 | -2.87431438 |
| 1 | 0.85238443  | -1.85460645 | -3.26964627 |

### Li<sup>+</sup>(DOL)<sub>3</sub>(DME)

|   |             |             |             |
|---|-------------|-------------|-------------|
| 1 | -0.08831039 | 2.42677319  | 1.42027608  |
| 6 | 0.43380519  | 2.66783263  | 0.49617895  |
| 1 | -0.11393413 | 3.45788030  | -0.03579846 |
| 8 | 0.53340023  | 1.54490409  | -0.33891138 |
| 8 | 1.73277832  | 3.03524387  | 0.73129744  |
| 6 | 2.33294006  | 2.97614606  | -0.53539446 |
| 1 | 3.41588161  | 2.87558966  | -0.43708051 |
| 1 | 2.12582818  | 3.88406566  | -1.10931777 |
| 6 | 1.65416368  | 1.76866532  | -1.16044328 |
| 1 | 2.28408487  | 0.88455340  | -1.14415090 |
| 1 | 1.34747568  | 1.94767406  | -2.19313772 |
| 1 | -2.78157822 | -0.71121898 | -2.49361059 |
| 6 | -1.76881157 | -0.50637511 | -2.12265658 |
| 1 | -1.20583333 | -1.43653489 | -2.09692159 |

|   |             |             |             |
|---|-------------|-------------|-------------|
| 8 | -1.83905703 | 0.07949160  | -0.85936685 |
| 8 | -1.13721472 | 0.45389111  | -2.87930324 |
| 6 | -1.77369173 | 1.66009206  | -2.52870757 |
| 1 | -1.04763563 | 2.47180589  | -2.55405877 |
| 1 | -2.57547007 | 1.90052230  | -3.23377327 |
| 6 | -2.32170321 | 1.37251846  | -1.13667648 |
| 1 | -1.98467061 | 2.06777004  | -0.37454087 |
| 1 | -3.41557806 | 1.37103040  | -1.13290442 |
| 3 | -0.15731115 | -0.27091606 | 0.00751966  |
| 1 | 2.09570816  | -0.31252608 | 2.93800071  |
| 6 | 1.50657764  | 0.44279459  | 2.40006310  |
| 1 | 2.12652412  | 0.91572710  | 1.64297170  |
| 8 | 0.95845515  | 1.36082493  | 3.25771588  |
| 8 | 0.39190329  | -0.18716102 | 1.82376744  |
| 6 | -0.55060554 | -0.31403450 | 2.86048222  |
| 1 | -1.53682748 | -0.05116681 | 2.47874690  |
| 1 | -0.59476141 | -1.34368113 | 3.22246923  |
| 6 | -0.04846127 | 0.64914922  | 3.92949707  |
| 1 | -0.81060971 | 1.33909494  | 4.29803831  |
| 1 | 0.36030835  | 0.10490526  | 4.78592417  |
| 1 | -2.12228764 | -3.34839577 | 1.50708552  |
| 1 | -2.82091198 | -1.85822106 | 0.83222364  |
| 6 | -2.14329977 | -2.68688925 | 0.63788362  |
| 8 | -0.86151156 | -2.15230932 | 0.37335363  |
| 1 | -2.51719371 | -3.25983417 | -0.21348938 |
| 6 | 0.10456366  | -3.10428100 | 0.04868598  |
| 1 | -0.16777042 | -3.61397108 | -0.88072651 |
| 1 | 0.20142514  | -3.87905772 | 0.81898288  |
| 6 | 1.39646732  | -2.36747625 | -0.11994403 |



|   |            |             |             |
|---|------------|-------------|-------------|
| 1 | 2.17614645 | -3.02929994 | -0.50955559 |
| 1 | 1.73188438 | -1.99075729 | 0.84317716  |
| 8 | 1.16839161 | -1.25971018 | -0.94866627 |
| 1 | 1.14746122 | -0.60814513 | -2.87979977 |
| 1 | 2.59294831 | -1.54214375 | -2.42581256 |
| 6 | 1.51077267 | -1.45752457 | -2.30894886 |
| 1 | 1.05514504 | -2.36731506 | -2.70064361 |

### Li<sup>+</sup>(DOL)<sub>4</sub>

|   |             |             |             |
|---|-------------|-------------|-------------|
| 1 | -0.56308777 | -1.75871608 | -2.29730001 |
| 6 | -1.56542587 | -1.61369040 | -1.89530381 |
| 1 | -2.22143320 | -1.20548210 | -2.67610374 |
| 8 | -1.55017091 | -0.71273732 | -0.80860435 |
| 8 | -2.06671637 | -2.77010224 | -1.35720012 |
| 6 | -3.16989843 | -2.34926988 | -0.59615425 |
| 1 | -3.40297362 | -3.09134352 | 0.17028253  |
| 1 | -4.05375486 | -2.21938900 | -1.22718034 |
| 6 | -2.69830370 | -1.01341474 | -0.03988356 |
| 1 | -2.41467084 | -1.06587758 | 1.01028751  |
| 1 | -3.45146284 | -0.22771747 | -0.15089182 |
| 1 | 1.52459632  | -0.47438387 | 2.35605689  |
| 6 | 0.76210157  | 0.21689759  | 2.72747754  |
| 1 | 0.32932172  | -0.18546538 | 3.65343405  |
| 8 | -0.26280151 | 0.38679026  | 1.78051064  |
| 8 | 1.25994395  | 1.48371647  | 2.89943836  |
| 6 | 0.11996801  | 2.29888258  | 3.02188162  |
| 1 | -0.22543237 | 2.32168637  | 4.05948737  |
| 1 | 0.35651103  | 3.31491664  | 2.71012680  |

|   |             |             |             |
|---|-------------|-------------|-------------|
| 6 | -0.89235479 | 1.60323466  | 2.12481149  |
| 1 | -1.83507574 | 1.40858322  | 2.64457929  |
| 1 | -1.10695708 | 2.15999415  | 1.21930527  |
| 1 | 2.44798912  | 2.50458460  | -0.78844970 |
| 6 | 1.62649826  | 2.26843750  | -0.09903531 |
| 1 | 2.02181512  | 1.79320267  | 0.79628422  |
| 8 | 0.71204120  | 1.42813575  | -0.76106386 |
| 8 | 0.88466093  | 3.38151117  | 0.20652025  |
| 6 | 0.18239070  | 3.66732474  | -0.97628104 |
| 1 | -0.72161035 | 4.23549947  | -0.74683892 |
| 1 | 0.79379507  | 4.26301570  | -1.65998823 |
| 6 | -0.08703313 | 2.28258573  | -1.55171397 |
| 1 | -1.12833238 | 1.97464925  | -1.46462340 |
| 1 | 0.19908395  | 2.21171147  | -2.60519232 |
| 3 | 0.01168528  | -0.12184277 | 0.00676003  |
| 1 | 1.46674042  | -3.42277536 | 0.60986691  |
| 6 | 0.83984581  | -2.88735564 | -0.11587333 |
| 1 | -0.21005872 | -2.99745730 | 0.15321151  |
| 8 | 1.07716495  | -3.29946900 | -1.40153475 |
| 8 | 1.22231783  | -1.52878530 | -0.12107808 |
| 6 | 2.34747471  | -1.44810554 | -0.97348287 |
| 1 | 2.22148631  | -0.59856796 | -1.64296348 |
| 1 | 3.25992342  | -1.29087884 | -0.39073745 |
| 6 | 2.34930066  | -2.78472696 | -1.70201617 |
| 1 | 2.47362172  | -2.69939168 | -2.78355039 |
| 1 | 3.13727640  | -3.43841407 | -1.31727700 |

Li<sup>+</sup>(GBL)<sub>4</sub>

|   |             |             |             |
|---|-------------|-------------|-------------|
| 6 | 17.71814300 | -7.96839827 | 2.82962109  |
| 6 | 17.41945193 | -6.85692651 | 1.81690510  |
| 6 | 16.75884737 | -5.78038348 | 2.65911366  |
| 6 | 17.84844654 | -7.17958272 | 4.13915299  |
| 8 | 16.99054623 | -6.00419973 | 3.96997586  |
| 8 | 16.11310079 | -4.82376323 | 2.27249450  |
| 1 | 18.62831797 | -8.54112076 | 2.60314322  |
| 1 | 16.87095968 | -8.66915308 | 2.88908755  |
| 1 | 16.76474359 | -7.14586555 | 0.98309189  |
| 1 | 18.87478758 | -6.81863528 | 4.31561090  |
| 1 | 17.49111217 | -7.71583239 | 5.02817094  |
| 6 | 13.95375870 | -1.36203020 | -1.92569354 |
| 6 | 13.21519403 | -1.61424193 | -0.60623704 |
| 6 | 14.33578591 | -1.92282868 | 0.37020789  |
| 6 | 15.32324616 | -0.87365746 | -1.43586282 |
| 8 | 15.52021388 | -1.51451816 | -0.13330756 |
| 8 | 14.24677694 | -2.44816376 | 1.46439268  |
| 1 | 13.46229432 | -0.62344502 | -2.57430238 |
| 1 | 14.06329095 | -2.30222464 | -2.48807783 |
| 1 | 12.48792263 | -2.43760877 | -0.62581723 |
| 1 | 12.69221606 | -0.71338939 | -0.23744409 |
| 1 | 15.35150524 | 0.21692854  | -1.27787868 |
| 1 | 16.16507200 | -1.17355213 | -2.07389153 |
| 6 | 18.04962330 | 0.95341294  | 5.00222018  |
| 6 | 18.43331807 | -0.37776074 | 4.34577790  |
| 6 | 17.10687729 | -0.91627560 | 3.84075025  |
| 6 | 16.78397770 | 1.33895561  | 4.22532631  |
| 8 | 16.18537238 | 0.07004074  | 3.80446102  |
| 8 | 16.84838611 | -2.05339634 | 3.49234689  |

|   |             |             |            |
|---|-------------|-------------|------------|
| 1 | 18.82849947 | 1.72505257  | 4.92681678 |
| 1 | 17.81205080 | 0.80038853  | 6.06634068 |
| 1 | 18.91322759 | -1.10765540 | 5.01225891 |
| 1 | 19.09153472 | -0.24114570 | 3.46880896 |
| 1 | 17.00699021 | 1.91973135  | 3.31533688 |
| 1 | 16.03050890 | 1.86906272  | 4.82275124 |
| 3 | 15.33423196 | -3.15535691 | 2.92535116 |
| 6 | 11.47072279 | -4.87178304 | 6.23527001 |
| 6 | 12.33312036 | -3.61155504 | 6.09996586 |
| 6 | 13.14774967 | -3.87459790 | 4.84625002 |
| 6 | 11.36741899 | -5.34520168 | 4.77936919 |
| 8 | 12.59555738 | -4.87797645 | 4.13196478 |
| 8 | 14.15211181 | -3.29558086 | 4.47510832 |
| 1 | 10.48194407 | -4.68616557 | 6.67752550 |
| 1 | 11.98974867 | -5.62663136 | 6.84609456 |
| 1 | 12.99646088 | -3.40330731 | 6.95083161 |
| 1 | 11.72839742 | -2.70510261 | 5.91685761 |
| 1 | 10.51696639 | -4.89092431 | 4.24541012 |
| 1 | 11.33371399 | -6.43619470 | 4.65985159 |
| 1 | 18.33875542 | -6.42144036 | 1.38549812 |
